# Supplementary material for: Nucleosome breathing and remodeling constrain CRISPR-Cas9 function
Source: eLife. 2016 Apr 28;5:e13450. doi: 10.7554/eLife.13450 (PMC4880442; doi:10.7554/eLife.13450)
Supplement: Figure 1—figure supplement 1—source data 4. — DOI: http://dx.doi.org/10.7554/eLife.13450.020 [file elife-13450-fig1-figsupp1-data4.xlsx]

## Sheet: RNA#3,DNA
Replicate 1
Box #	Area	Intensity	Raw Intensity	Contents	Average Background	Background Subtracted		Fraction Unbound	Fraction Bound
1	5.092	8272.86	20682144	Total		785.326		0.0455492	0.954451
2	5.092	8306.9	20767250	Total		819.368		0.0508929	0.949107
3	5.092	8336.73	20841827	Total		849.199		0.0562872	0.943713
4	5.092	8489.83	21224583	Total		1002.3		0.0541614	0.945839
5	5.092	8533.27	21333166	Total		1045.73		0.106222	0.893778
6	5.092	8269.5	20673742	Total		781.965		0.254664	0.745336
7	5.092	8418.89	21047226	Total		931.358		0.518188	0.481812
8	5.092	8403.08	21007691	Total		915.544		0.692308	0.307692
9	5.092	8424.64	21061601	Total		937.108		0.836186	0.163814
10	5.092	8315.94	20789862	Total		828.413		0.942972	0.0570283
11	5.092	8041.89	20104723	Total		554.357		1.06516	0
12	5.092	8141.28	20353210	Total		653.752		0.923136	0.076864
13	5.092	7454.58	18636446	Background
14	5.092	7662.99	19157483	Background	7487.53
15	5.092	7345.02	18362563	Background
16	0.374	582.877	1457193	Unbound		35.771
17	0.374	588.806	1472016	Unbound		41.7
18	0.374	594.905	1487263	Unbound		47.799
19	0.374	601.392	1503479	Unbound		54.286
20	0.374	658.186	1645465	Unbound		111.08
21	0.374	746.244	1865610	Unbound		199.138
22	0.374	1029.72	2574313	Unbound		482.619
23	0.374	1180.94	2952360	Unbound		633.838
24	0.374	1330.7	3326758	Unbound		783.597
25	0.374	1328.28	3320690	Unbound		781.17
26	0.374	1137.58	2843959	Unbound		590.478
27	0.374	1150.61	2876521	Unbound		603.502
28	0.374	520.062	1300154	Background
29	0.374	568.028	1420071	Background	547.106
30	0.374	553.228	1383071	Background
Replicate 2
Box #	Area	Intensity	Raw Intensity	Contents	Average Background	Background Subtracted		Fraction Unbound	Fraction Bound
1	6.56	10559.5	26398788	Total		664.847		0.0459083	0.954092
2	6.56	10808	27020112	Total		913.377		0.0279315	0.972068
3	6.56	10311.1	25777738	Total		416.427		0.0643882	0.935612
4	6.56	10108.1	25270165	Total		213.398		0.101496	0.898504
5	6.56	10434.9	26087181	Total		540.204		0.078711	0.921289
6	6.56	10567.7	26419232	Total		673.025		0.397603	0.602397
7	6.56	10662.7	26656683	Total		768.005		0.753775	0.246225
8	6.56	10374.9	25937215	Total		480.218		1.01009	0
9	6.56	9947.42	24868538	Total		52.747		1	0
10	6.56	9943.1	24857759	Total		48.436		1	0
11	6.56	9916.59	24791475	Total		21.922		1	0
12	6.56	10351.6	25878914	Total		456.898		1	0
13	6.56	10018.3	25045670	Background
14	6.56	9936.43	24841069	Background	9894.67
15	6.56	9729.31	24323269	Background
1	0.562	874.24	2185599	Unbound		30.522
2	0.562	869.23	2173076	Unbound		25.512
3	0.562	870.531	2176327	Unbound		26.813
4	0.562	865.377	2163442	Unbound		21.659
5	0.562	886.238	2215595	Unbound		42.52
6	0.562	1111.32	2778287	Unbound		267.597
7	0.562	1422.62	3556552	Unbound		578.903
8	0.562	1328.78	3321948	Unbound		485.061
9	0.562	1123.45	2808634	Unbound		279.736
10	0.562	1164.7	2911761	Unbound		320.986
11	0.562	1213.78	3034458	Unbound		370.065
12	0.562	1598.19	3995478	Unbound		754.473
13	0.562	855.996	2139990	Background
14	0.562	840.969	2102422	Background	843.718
15	0.562	834.189	2085473	Background
Replicate 3
Box #	Area	Intensity	Raw Intensity	Contents	Average Background	Background Subtracted		Fraction Unbound	Fraction Bound
1	5.166	7634.75	19086875	Total		392.576		0.0267524	0.973248
2	5.166	7699.79	19249475	Total		457.616		0.0227622	0.977238
3	5.166	7637.5	19093752	Total		395.327		0.0128484	0.987152
4	5.166	7567.17	18917930	Total		324.998		0.0169057	0.983094
5	5.166	7886.64	19716602	Total		644.467		0.208948	0.791052
6	5.166	7813.84	19534592	Total		571.663		0.314459	0.685541
7	5.166	8094.46	20236139	Total		852.282		0.701902	0.298098
8	5.166	8149.88	20374702	Total		907.707		0.764569	0.235431
9	5.166	7950.33	19875827	Total		708.157		0.821582	0.178418
10	5.166	7893.03	19732580	Total		650.858		0.999117	0.000882937
11	5.166	7899.78	19749444	Total		657.604		1.00619	0
12	5.166	8013.08	20032696	Total		770.904		0.969798	0.0302018
13	5.166	7115.55	17788881	Background	7242.17
14	5.166	7090.44	17726106	Background
15	5.166	7520.53	18801321	Background
1	0.377	535.011	1337528	Unbound		10.5023
2	0.377	534.925	1337312	Unbound		10.4163
3	0.377	529.588	1323969	Unbound		5.07933
4	0.377	530.003	1325007	Unbound		5.49433
5	0.377	659.169	1647922	Unbound		134.66
6	0.377	704.273	1760682	Unbound		179.764
7	0.377	1122.73	2806817	Unbound		598.218
8	0.377	1218.51	3046282	Unbound		694.004
9	0.377	1106.32	2765796	Unbound		581.809
10	0.377	1174.79	2936980	Unbound		650.283
11	0.377	1186.18	2965460	Unbound		661.675
12	0.377	1272.13	3180325	Unbound		747.621
13	0.377	512.004	1280010	Background	524.509
14	0.377	520.42	1301049	Background
15	0.377	541.102	1352756	Background

## Sheet: RNA#3,Nucleosomes
Replicate 1
Box #	Area	Intensity	Raw Intensity	Contents	Average Background	Background Subtracted		Fraction Unbound	Fraction Bound
1	5.782	9421.42	23553551	Total		979.343		0.722551	0.277449
2	5.782	9563.15	23907886	Total		1121.08		0.827877	0.172123
3	5.782	9331.07	23327666	Total		888.989		0.849676	0.150324
4	5.782	9509.77	23774429	Total		1067.7		0.82714	0.17286
5	5.782	9313.01	23282523	Total		870.932		0.829716	0.170284
6	5.782	9424.84	23562105	Total		982.765		0.784648	0.215352
7	5.782	9494.84	23737096	Total		1052.76		0.740955	0.259045
8	5.782	9393.17	23482920	Total		951.091		0.745767	0.254233
9	5.782	9290.28	23225698	Total		848.202		0.761822	0.238178
10	5.782	9434.54	23586354	Total		992.465		0.673909	0.326091
11	5.782	9482.42	23706047	Total		1040.34		0.742219	0.257781
12	5.782	9426.68	23566691	Total		984.599		0.70375	0.29625
13	5.782	8301.97	20754930	Background
14	5.782	8472.91	21182273	Background	8442.08
15	5.782	8551.35	21378373	Background
1	0.488	1416.32	3540792	Unbound		707.625
2	0.488	1636.81	4092015	Unbound		928.114
3	0.488	1464.05	3660113	Unbound		755.353
4	0.488	1591.83	3979562	Unbound		883.133
5	0.488	1431.32	3578296	Unbound		722.626
6	0.488	1479.82	3699542	Unbound		771.125
7	0.488	1488.74	3721850	Unbound		780.048
8	0.488	1417.98	3544959	Unbound		709.292
9	0.488	1354.87	3387177	Unbound		646.179
10	0.488	1377.52	3443807	Unbound		668.831
11	0.488	1480.85	3702134	Unbound		772.162
12	0.488	1401.6	3504008	Unbound		692.911
13	0.488	689.256	1723140	Background
14	0.488	712.485	1781213	Background	708.692
15	0.488	724.334	1810834	Background
Replicate 2
Box #	Area	Intensity	Raw Intensity	Contents	Average Background	Background Subtracted		Fraction Unbound	Fraction Bound
1	5.997	9169.11	22922768	Total		249.391		1.41967	0
2	5.997	9477.35	23693373	Total		557.633		1.07447	0
3	5.997	9534.73	23836830	Total		615.016		0.97162	0.0283803
4	5.997	9520.52	23801304	Total		600.806		1.10841	0
5	5.997	9690.1	24225240	Total		770.38		0.922344	0.0776556
6	5.997	9560.2	23900494	Total		640.482		0.891022	0.108978
7	5.997	9618.88	24047197	Total		699.163		0.94756	0.0524403
8	5.997	9644.17	24110414	Total		724.45		0.888253	0.111747
9	5.997	9671.11	24177778	Total		751.395		0.923021	0.0769786
10	5.997	9557.07	23892670	Total		637.352		0.88396	0.11604
11	5.997	9643.72	24109290	Total		724		0.9127	0.0873001
12	5.997	9645.01	24112515	Total		725.29		0.773027	0.226973
13	5.997	8870.31	22175771	Background
14	5.997	8746.79	21866977	Background	8919.72
15	5.997	9142.05	22855120	Background
1	0.358	899.067	2247667	Unbound		354.054
2	0.358	1144.18	2860439	Unbound		599.163
3	0.358	1142.58	2856438	Unbound		597.562
4	0.358	1210.95	3027383	Unbound		665.94
5	0.358	1255.57	3138922	Unbound		710.556
6	0.358	1115.7	2789243	Unbound		570.684
7	0.358	1207.51	3018780	Unbound		662.499
8	0.358	1188.51	2971271	Unbound		643.495
9	0.358	1238.57	3096417	Unbound		693.554
10	0.358	1108.41	2771017	Unbound		563.394
11	0.358	1205.81	3014521	Unbound		660.795
12	0.358	1105.68	2764205	Unbound		560.669
13	0.358	534.323	1335808	Background
14	0.358	542.504	1356260	Background	545.013
15	0.358	558.212	1395530	Background
Box #	Area	Intensity	Raw Intensity	Contents	Average Background	Background Subtracted		Fraction Unbound	Fraction Bound
1	3.405	5482.99	13707478	Total		591.385		0.9503	0.0496997
2	3.405	5436.92	13592308	Total		545.317		1.04672	0
3	3.405	5370.4	13425993	Total		478.791		1.03294	0
4	3.405	5397.93	13494832	Total		506.327		1.06426	0
5	3.405	5549.12	13872790	Total		657.51		0.993017	0.00698342
6	3.405	5488.74	13721845	Total		597.132		0.981484	0.0185163
7	3.405	5516.89	13792228	Total		625.285		0.940428	0.0595723
8	3.405	5489.19	13722976	Total		597.584		0.908559	0.091441
9	3.405	5467.72	13669296	Total		576.112		0.835027	0.164973
10	3.405	5465.81	13664523	Total		574.203		0.870097	0.129903
11	3.405	5540	13849995	Total		648.392		0.733868	0.266132
12	3.405	5570.84	13927106	Total		679.236		0.644198	0.355802
13	3.405	4955.35	12388371	Background
14	3.405	4804.22	12010553	Background	4891.61
15	3.405	4915.25	12288126	Background
1	0.231	896.387	2240967	Unbound		561.993
2	0.231	905.188	2262969	Unbound		570.794
3	0.231	828.954	2072384	Unbound		494.56
4	0.231	873.257	2183143	Unbound		538.863
5	0.231	987.312	2468279	Unbound		652.918
6	0.231	920.469	2301173	Unbound		586.075
7	0.231	922.429	2306072	Unbound		588.035
8	0.231	877.334	2193336	Unbound		542.94
9	0.231	815.463	2038657	Unbound		481.069
10	0.231	834.006	2085015	Unbound		499.612
11	0.231	810.228	2025570	Unbound		475.834
12	0.231	771.956	1929891	Unbound		437.562
13	0.231	335.028	837571	Background		0.634
14	0.231	338.452	846130	Background	334.394
15	0.231	329.702	824254	Background
