# Supplementary material for: Nucleosome breathing and remodeling constrain CRISPR-Cas9 function
Source: eLife. 2016 Apr 28;5:e13450. doi: 10.7554/eLife.13450 (PMC4880442; doi:10.7554/eLife.13450)
Supplement: Figure 1—source data 12. — DOI: http://dx.doi.org/10.7554/eLife.13450.015 [file elife-13450-fig1-data12.xlsx]

## Sheet: RNA#1,DNA
Replicate 1
Box #	Area	Intensity	Raw Intenisty	Average Background	Background Subtracted	Contents	Uncleaved/Total
1	0.66	1063.76	2659388		133.803	Uncleaved	0.877634
2	0.66	1049.52	2623808		119.571	Uncleaved	0.806796
3	0.66	1029.51	2573774		99.5577	Uncleaved	0.728691
4	0.66	989.187	2472967		59.2347	Uncleaved	0.459728
5	0.66	963.772	2409430		33.8197	Uncleaved	0.252259
6	0.66	955.976	2389940		26.0237	Uncleaved	0.21282
7	0.66	931.764	2329410		1.81167	Uncleaved	0.017598
8	0.66	930.637	2326592		0.684667	Uncleaved	0.00534957
9	0.66	926.357	2315893		0	Uncleaved	0
10	0.66	948.608	2371521		18.6557	Cleaved
11	0.66	958.586	2396466		28.6337	Cleaved
12	0.66	967.02	2417549		37.0677	Cleaved
13	0.66	999.565	2498912		69.6127	Cleaved
14	0.66	1030.2	2575501		100.248	Cleaved
15	0.66	1026.21	2565523		96.2567	Cleaved
16	0.66	1031.09	2577720		101.136	Cleaved
17	0.66	1057.25	2643132		127.301	Cleaved
18	0.66	1043.46	2608656		113.51	Cleaved
19	0.66	943.848	2359619			Background
20	0.66	894.076	2235189	929.952		Background
21	0.66	951.933	2379833			Background
Replicate 2
Box #	Area	Intensity	Raw Intenisty	Average Background	Background Subtracted	Contents	Uncleaved/Total
1	0.775	1205.45	3013615		124.979	Uncleaved	0.952347
2	0.775	1276.55	3191363		196.078	Uncleaved	0.928722
3	0.775	1234.39	3085966		153.919	Uncleaved	0.782507
4	0.775	1198.87	2997181		118.405	Uncleaved	0.622372
5	0.775	1146.93	2867325		66.4627	Uncleaved	0.335781
6	0.775	1103.29	2758227		22.8237	Uncleaved	0.136758
7	0.775	1075.59	2688975		0	Uncleaved	0
8	0.775	1069.97	2674924		0	Uncleaved	0
9	0.775	1073.59	2683979		0	Uncleaved	0
10	0.775	1086.72	2716802		6.25367	Cleaved
11	0.775	1095.52	2738790		15.0487	Cleaved
12	0.775	1123.25	2808121		42.7807	Cleaved
13	0.775	1152.31	2880774		71.8427	Cleaved
14	0.775	1211.94	3029848		131.472	Cleaved
15	0.775	1224.53	3061334		144.067	Cleaved
16	0.775	1189.34	2973357		108.876	Cleaved
17	0.775	1145.31	2863265		64.8387	Cleaved
18	0.775	1140.74	2851851		60.2727	Cleaved
19	0.775	1081.37	2703412			Background
20	0.775	1082.1	2705240	1080.47		Background
21	0.775	1077.94	2694852			Background
Replicate 3
Box #	Area	Intensity	Raw Intenisty	Average Background	Background Subtracted	Contents	Uncleaved/Total
1	0.726	1238.3	3095759		130.253	Uncleaved	0.780299
2	0.726	1254.65	3136625		146.599	Uncleaved	0.753862
3	0.726	1244.03	3110078		135.98	Uncleaved	0.619208
4	0.726	1203.1	3007760		95.053	Uncleaved	0.531961
5	0.726	1141.24	2853106		33.191	Uncleaved	0.221539
6	0.726	1110.12	2775298		2.068	Uncleaved	0.0138131
7	0.726	1090.75	2726867		0	Uncleaved	0
8	0.726	1092.67	2731664		0	Uncleaved	0
9	0.726	1089.81	2724536		0	Uncleaved	0
10	0.726	1144.72	2861812		36.674	Cleaved
11	0.726	1155.92	2889790		47.865	Cleaved
12	0.726	1191.67	2979186		83.623	Cleaved
13	0.726	1191.68	2979205		83.631	Cleaved
14	0.726	1224.68	3061701		116.629	Cleaved
15	0.726	1255.7	3139241		147.645	Cleaved
16	0.726	1240.07	3100168		132.016	Cleaved
17	0.726	1229.48	3073703		121.43	Cleaved
18	0.726	1227.26	3068158		119.212	Cleaved
19	0.726	1096.03	2740085	1108.05		Background
20	0.726	1127.79	2819470			Background
21	0.726	1087.44	2718602			Background
22	0.726	1120.94	2802353

## Sheet: RNA#1,Nucleosomes
Replicate 1
Box #	Area	Intensity	Raw Intenisty	Average Background	Background Subtracted	Contents	Uncleaved/Total
1	0.66	1238.6	3096500		320.568	Uncleaved	0.959747
2	0.66	1099.92	2749809		181.892	Uncleaved	0.911182
3	0.66	1091.27	2728168		173.235	Uncleaved	0.788414
4	0.66	1041.21	2603020		123.176	Uncleaved	0.579107
5	0.66	981.25	2453125		63.218	Uncleaved	0.25534
6	0.66	943.72	2359301		25.688	Uncleaved	0.127157
7	0.66	931.972	2329929		13.94	Uncleaved	0.0634184
8	0.66	921.226	2303066		3.194	Uncleaved	0.0156535
9	0.66	922.516	2306289		4.484	Uncleaved	0.0222575
10	0.66	931.477	2328693		13.445	Cleaved
11	0.66	935.762	2339404		17.73	Cleaved
12	0.66	964.523	2411307		46.491	Cleaved
13	0.66	1007.56	2518889		89.524	Cleaved
14	0.66	1102.4	2755995		184.366	Cleaved
15	0.66	1094.36	2735904		176.33	Cleaved
16	0.66	1123.9	2809754		205.87	Cleaved
17	0.66	1118.88	2797206		200.85	Cleaved
18	0.66	1115.01	2787519		196.976	Cleaved
19	0.66	932.125	2330313			Background
20	0.66	889.801	2224503	918.032		Background
21	0.66	932.17	2330425			Background
Replicate 2
Box #	Area	Intensity	Raw Intenisty	Average Background	Background Subtracted	Contents	Uncleaved/Total
1	0.775	1353.24	3383102		243.274	Uncleaved	1
2	0.775	1301.89	3254729		191.925	Uncleaved	1
3	0.775	1323.99	3309974		214.023	Uncleaved	0.893498
4	0.775	1256.42	3141044		146.451	Uncleaved	0.645091
5	0.775	1156.41	2891022		46.4417	Uncleaved	0.277583
6	0.775	1128.57	2821423		18.6017	Uncleaved	0.0920454
7	0.775	1101.16	2752911		0	Uncleaved	0
8	0.775	1097.89	2744721		0	Uncleaved	0
9	0.775	1135.26	2838158		25.2957	Uncleaved	0.188078
10	0.775	1095.7	2739243		0	Cleaved
11	0.775	1109.14	2772860		0	Cleaved
12	0.775	1135.48	2838696		25.5107	Cleaved
13	0.775	1190.54	2976349		80.5727	Cleaved
14	0.775	1230.83	3077083		120.866	Cleaved
15	0.775	1293.46	3233645		183.491	Cleaved
16	0.775	1268.67	3171664		158.699	Cleaved
17	0.775	1251.09	3127731		141.125	Cleaved
18	0.775	1219.17	3047917		109.2	Cleaved
19	0.775	1096.78	2741959			Background
20	0.775	1110.64	2776606	1109.97		Background
21	0.775	1122.48	2806189			Background
Replicate 3
Box #	Area	Intensity	Raw Intenisty	Average Background	Background Subtracted	Contents	Uncleaved/Total
1	0.726	1219.14	3047855		140.72	Uncleaved	0.839933
2	0.726	1209.96	3024899		131.538	Uncleaved	0.7039
3	0.726	1212.92	3032311		134.502	Uncleaved	0.696829
4	0.726	1151.95	2879872		73.5273	Uncleaved	0.521683
5	0.726	1113.8	2784511		35.3823	Uncleaved	0.225045
6	0.726	1077.48	2693690		0	Uncleaved	0
7	0.726	1064.09	2660219		0	Uncleaved	0
8	0.726	1056.08	2640195		0	Uncleaved	0
9	0.726	1067.46	2668645		0	Uncleaved	0
10	0.726	1105.24	2763098		26.8173	Cleaved
11	0.726	1133.75	2834385		55.3323	Cleaved
12	0.726	1136.94	2842349		58.5183	Cleaved
13	0.726	1145.84	2864592		67.4153	Cleaved
14	0.726	1200.26	3000658		121.841	Cleaved
15	0.726	1205.19	3012988		126.773	Cleaved
16	0.726	1193.7	2984261		115.282	Cleaved
17	0.726	1171.82	2929542		93.3953	Cleaved
18	0.726	1172.75	2931880		94.3303	Cleaved
19	0.726	1079.89	2699722	1078.42		Background
20	0.726	1084.95	2712366			Background
21	0.726	1070.43	2676076			Background

## Sheet: RNA#2,DNA
Replicate 1
Box #	Area	Intensity	Raw Intenisty	Average Background	Background Subtracted	Contents	Uncleaved/Total
1	0.185	440.591	1101477		165.989	Uncleaved	0.960655
2	0.185	425.697	1064243		151.095	Uncleaved	0.959325
3	0.185	421.619	1054048		147.017	Uncleaved	0.973408
4	0.185	404.245	1010612		129.643	Uncleaved	0.986484
5	0.185	407.4	1018501		132.798	Uncleaved	0.978627
6	0.185	389.67	974175		115.068	Uncleaved	0.973895
7	0.185	373.737	934342		99.1353	Uncleaved	0.924342
8	0.185	341.836	854589		67.2343	Uncleaved	0.773105
9	0.185	340.098	850245		65.4963	Uncleaved	0.669733
10	0.185	281.4	703499		6.79833	Cleaved
11	0.185	281.008	702521		6.40633	Cleaved
12	0.185	278.618	696545		4.01633	Cleaved
13	0.185	276.378	690946		1.77633	Cleaved
14	0.185	277.502	693755		2.90033	Cleaved
15	0.185	277.686	694216		3.08433	Cleaved
16	0.185	282.716	706791		8.11433	Cleaved
17	0.185	294.334	735834		19.7323	Cleaved
18	0.185	306.9	767251		32.2983	Cleaved
19	0.185	273.022	682556	274.602		Background
20	0.185	274.276	685690			Background
21	0.185	276.507	691268			Background
Replicate 2
Box #	Area	Intensity	Raw Intenisty	Average Background	Background Subtracted	Contents	Uncleaved/Total
1	0.211	429.316	1073290		115.667	Uncleaved	0.917087
2	0.211	411.78	1029451		98.1313	Uncleaved	0.902418
3	0.211	407.16	1017899		93.5113	Uncleaved	0.963065
4	0.211	408.755	1021888		95.1063	Uncleaved	0.970387
5	0.211	409.487	1023718		95.8383	Uncleaved	1
6	0.211	399	997500		85.3513	Uncleaved	0.951322
7	0.211	377.28	943201		63.6313	Uncleaved	0.896763
8	0.211	361.23	903075		47.5813	Uncleaved	0.752754
9	0.211	357.613	894032		43.9643	Uncleaved	0.631765
10	0.211	324.106	810265		10.4573	Cleaved
11	0.211	324.26	810650		10.6113	Cleaved
12	0.211	317.235	793087		3.58633	Cleaved
13	0.211	316.551	791378		2.90233	Cleaved
14	0.211	312.963	782407		0	Cleaved
15	0.211	318.016	795039		4.36733	Cleaved
16	0.211	320.974	802434		7.32533	Cleaved
17	0.211	329.277	823192		15.6283	Cleaved
18	0.211	339.274	848186		25.6253	Cleaved
19	0.211	310.975	777437	313.649		Background
20	0.211	310.635	776588			Background
21	0.211	319.336	798340			Background
Replicate 3
Box #	Area	Intensity	Raw Intenisty	Average Background	Background Subtracted	Contents	Uncleaved/Total
1	0.211	397	992501		88.0777	Uncleaved	0.932677
2	0.211	455.807	1139517		146.885	Uncleaved	0.960054
3	0.211	442.738	1106845		133.816	Uncleaved	0.974294
4	0.211	433.516	1083789		124.594	Uncleaved	0.969545
5	0.211	429.858	1074644		120.936	Uncleaved	0.909138
6	0.211	403.279	1008198		94.3567	Uncleaved	0.853881
7	0.211	392.384	980959		83.4617	Uncleaved	0.836379
8	0.211	382.47	956175		73.5477	Uncleaved	0.77173
9	0.211	386.693	966733		77.7707	Uncleaved	0.657901
10	0.211	315.28	788200		6.35767	Cleaved
11	0.211	315.034	787584		6.11167	Cleaved
12	0.211	312.453	781133		3.53067	Cleaved
13	0.211	312.836	782089		3.91367	Cleaved
14	0.211	321.009	802522		12.0867	Cleaved
15	0.211	325.069	812672		16.1467	Cleaved
16	0.211	325.25	813125		16.3277	Cleaved
17	0.211	330.677	826693		21.7547	Cleaved
18	0.211	349.362	873404		40.4397	Cleaved
19	0.211	305.91	764776	308.922		Background
20	0.211	314.607	786518			Background
21	0.211	306.25	765625			Background

## Sheet: RNA#2,Nucleosomes
Replicate 1
Box #	Area	Intensity	Raw Intenisty	Average Background	Background Subtracted	Contents	Uncleaved/Total
1	0.185	469.891	1174727		199.197	Uncleaved	0.969058
2	0.185	439.744	1099359		169.05	Uncleaved	0.965899
3	0.185	438.652	1096629		167.958	Uncleaved	0.972929
4	0.185	431.618	1079044		160.924	Uncleaved	0.979981
5	0.185	425.326	1063314		154.632	Uncleaved	0.991235
6	0.185	418.316	1045790		147.622	Uncleaved	0.968958
7	0.185	400.498	1001246		129.804	Uncleaved	0.949475
8	0.185	384.942	962356		114.248	Uncleaved	0.971841
9	0.185	396.399	990998		125.705	Uncleaved	1
10	0.185	277.054	692636		6.36033	Cleaved
11	0.185	276.662	691655		5.96833	Cleaved
12	0.185	275.367	688418		4.67333	Cleaved
13	0.185	273.981	684952		3.28733	Cleaved
14	0.185	272.061	680153		1.36733	Cleaved
15	0.185	275.423	688557		4.72933	Cleaved
16	0.185	277.601	694002		6.90733	Cleaved
17	0.185	274.004	685011		3.31033	Cleaved
18	0.185	270.062	675155		0	Cleaved
19	0.185	277.309	693273	270.694		Background
20	0.185	270.361	675902			Background
21	0.185	264.411	661028			Background
Replicate 2
Box #	Area	Intensity	Raw Intenisty	Average Background	Background Subtracted	Contents	Uncleaved/Total
1	0.211	516.434	1291085		202.817	Uncleaved	0.995071
2	0.211	584.976	1462439		271.359	Uncleaved	1
3	0.211	565.618	1414046		252.001	Uncleaved	0.997942
4	0.211	485.18	1212949		171.563	Uncleaved	1
5	0.211	399.248	998120		85.6307	Uncleaved	1
6	0.211	358.954	897385		45.3367	Uncleaved	1
7	0.211	341.224	853060		27.6067	Uncleaved	0.936285
8	0.211	338.718	846796		25.1007	Uncleaved	0.771774
9	0.211	337.869	844672		24.2517	Uncleaved	0.952228
10	0.211	314.622	786555		1.00467	Cleaved
11	0.211	313.247	783118		0	Cleaved
12	0.211	314.137	785343		0.519667	Cleaved
13	0.211	311.273	778182		0	Cleaved
14	0.211	311.731	779328		0	Cleaved
15	0.211	313.338	783346		0	Cleaved
16	0.211	315.496	788739		1.87867	Cleaved
17	0.211	321.04	802599		7.42267	Cleaved
18	0.211	314.834	787085		1.21667	Cleaved
19	0.211	316.489	791223	313.617		Background
20	0.211	317.808	794520			Background
21	0.211	306.555	766387			Background
Replicate 3
Box #	Area	Intensity	Raw Intenisty	Average Background	Background Subtracted	Contents	Uncleaved/Total
1	0.211	517.076	1292691		202.165	Uncleaved	1
2	0.211	487.797	1219492		172.886	Uncleaved	1
3	0.211	481.768	1204420		166.857	Uncleaved	1
4	0.211	493.566	1233916		178.655	Uncleaved	1
5	0.211	474.989	1187473		160.078	Uncleaved	1
6	0.211	470.352	1175880		155.441	Uncleaved	0.972306
7	0.211	436.885	1092212		121.974	Uncleaved	0.985606
8	0.211	445.02	1112551		130.109	Uncleaved	0.995582
9	0.211	322.532	806331		7.62133	Uncleaved	0.472797
10	0.211	311.684	779211		0	Cleaved
11	0.211	310.196	775490		0	Cleaved
12	0.211	314.133	785332		0	Cleaved
13	0.211	310.47	776174		0	Cleaved
14	0.211	312.844	782109		0	Cleaved
15	0.211	319.338	798345		4.42733	Cleaved
16	0.211	316.692	791731		1.78133	Cleaved
17	0.211	315.488	788720		0.577333	Cleaved
18	0.211	323.409	808523		8.49833	Cleaved
19	0.211	308.748	771871	314.911		Background
20	0.211	319.169	797923			Background
21	0.211	316.815	792037			Background

## Sheet: RNA#3,DNA
Replicate 1
Box #	Area	Intensity	Raw Intenisty	Average Background	Background Subtracted	Contents	Uncleaved/Total
1	0.752	1303.88	3259692		252.066	Uncleaved	0.960717
2	0.752	1209.98	3024960		158.173	Uncleaved	0.880531
3	0.752	1171.88	2929696		120.067	Uncleaved	0.714129
4	0.752	1152.32	2880797		100.508	Uncleaved	0.509931
5	0.752	1061.25	2653131		9.44067	Uncleaved	0.064389
6	0.752	1054.98	2637452		3.16967	Uncleaved	0.0208103
7	0.752	1052.55	2631364		0.734667	Uncleaved	0.00463184
8	0.752	1049.37	2623426		0	Uncleaved	0
9	0.752	1046.76	2616903		0	Uncleaved	0
10	0.752	1062.12	2655295		10.3067	Cleaved
11	0.752	1073.27	2683181		21.4607	Cleaved
12	0.752	1099.88	2749687		48.0637	Cleaved
13	0.752	1148.4	2871011		96.5927	Cleaved
14	0.752	1188.99	2972476		137.179	Cleaved
15	0.752	1200.95	3002386		149.143	Cleaved
16	0.752	1209.69	3024222		157.878	Cleaved
17	0.752	1190.9	2977253		139.09	Cleaved
18	0.752	1188.71	2971767		136.896	Cleaved
19	0.752	1059.39	2648475	1051.81		Background
20	0.752	1052.32	2630800			Background
21	0.752	1043.72	2609310			Background
Replicate 2
Box #	Area	Intensity	Raw Intenisty	Average Background	Background Subtracted	Contents	Uncleaved/Total
1	0.752	1239.79	3099466		213.204	Uncleaved	0.955306
2	0.752	1196.67	2991686		170.092	Uncleaved	0.860399
3	0.752	1163.08	2907690		136.494	Uncleaved	0.698644
4	0.752	1131.92	2829789		105.334	Uncleaved	0.493109
5	0.752	1060.88	2652211		34.3017	Uncleaved	0.170226
6	0.752	1026.74	2566842		0.154667	Uncleaved	0.000878327
7	0.752	1020.31	2550774		0	Uncleaved	0
8	0.752	1015.75	2539364		0	Uncleaved	0
9	0.752	1024.38	2560948		0	Uncleaved	0
10	0.752	1036.56	2591393		9.97467	Cleaved
11	0.752	1054.18	2635450		27.5977	Cleaved
12	0.752	1085.46	2713644		58.8757	Cleaved
13	0.752	1134.86	2837150		108.278	Cleaved
14	0.752	1193.79	2984468		167.205	Cleaved
15	0.752	1202.52	3006301		175.938	Cleaved
16	0.752	1168.49	2921224		141.908	Cleaved
17	0.752	1154.97	2887435		128.392	Cleaved
18	0.752	1156.7	2891741		130.114	Cleaved
19	0.752	1036.45	2591133	1026.58		Background
20	0.752	1042.5	2606245			Background
21	0.752	1000.8	2501990			Background
Replicate 3
Box #	Area	Intensity	Raw Intenisty	Average Background	Background Subtracted	Contents	Uncleaved/Total
1	0.77	1212.67	3031677		133.377	Uncleaved	0.903273
2	0.77	1260.4	3150990		181.102	Uncleaved	0.864116
3	0.77	1248.56	3121405		169.268	Uncleaved	0.807154
4	0.77	1223	3057504		143.708	Uncleaved	0.662781
5	0.77	1121.22	2803045		41.9237	Uncleaved	0.24612
6	0.77	1087.65	2719136		8.35967	Uncleaved	0.0628512
7	0.77	1089.85	2724620		10.5537	Uncleaved	0.0785212
8	0.77	1094.4	2735995		15.1037	Uncleaved	0.115454
9	0.77	1097.15	2742866		17.8517	Uncleaved	0.132875
10	0.77	1093.58	2733942		14.2827	Cleaved
11	0.77	1107.77	2769433		28.4787	Cleaved
12	0.77	1119.74	2799340		40.4417	Cleaved
13	0.77	1152.41	2881030		73.1177	Cleaved
14	0.77	1207.71	3019272		128.415	Cleaved
15	0.77	1203.94	3009856		124.648	Cleaved
16	0.77	1203.15	3007865		123.852	Cleaved
17	0.77	1195.01	2987525		115.716	Cleaved
18	0.77	1195.79	2989481		116.498	Cleaved
19	0.77	1099.85	2749616	1079.29		Background
20	0.77	1088.81	2722026			Background
21	0.77	1049.23	2623068			Background

## Sheet: RNA#3,Nucleosomes
Replicate 1
Box #	Area	Intensity	Raw Intenisty	Average Background	Background Subtracted	Contents	Uncleaved/Total
1	0.752	1410.57	3526419		360.994	Uncleaved	0.987995
2	0.752	1306.35	3265865		256.772	Uncleaved	0.976047
3	0.752	1359.53	3398824		309.956	Uncleaved	0.966648
4	0.752	1304	3259992		254.423	Uncleaved	0.947101
5	0.752	1294.09	3235231		244.518	Uncleaved	0.949716
6	0.752	1295.72	3239297		246.145	Uncleaved	0.925631
7	0.752	1216.74	3041855		167.168	Uncleaved	0.906323
8	0.752	1163.56	2908911		113.99	Uncleaved	1
9	0.752	1138.35	2845869		88.7743	Uncleaved	0.948407
10	0.752	1053.96	2634901		4.38633	Cleaved
11	0.752	1055.88	2639688		6.30133	Cleaved
12	0.752	1060.27	2650671		10.6943	Cleaved
13	0.752	1063.78	2659461		14.2103	Cleaved
14	0.752	1062.52	2656299		12.9463	Cleaved
15	0.752	1069.35	2673375		19.7763	Cleaved
16	0.752	1066.85	2667131		17.2783	Cleaved
17	0.752	1044.4	2610999		0	Cleaved
18	0.752	1054.4	2636007		4.82933	Cleaved
19	0.752	1056.95	2642387	1049.57		Background
20	0.752	1048.99	2622471			Background
21	0.752	1042.78	2606944			Background
Replicate 2
Box #	Area	Intensity	Raw Intenisty	Average Background	Background Subtracted	Contents	Uncleaved/Total
1	0.752	1362.82	3407051		322.631	Uncleaved	1
2	0.752	1557.3	3893255		517.113	Uncleaved	1
3	0.752	1459.77	3649426		419.581	Uncleaved	1
4	0.752	1358.11	3395284		317.925	Uncleaved	1
5	0.752	1150.65	2876626		110.461	Uncleaved	1
6	0.752	1068	2669996		27.8093	Uncleaved	0.880832
7	0.752	1083.23	2708066		43.0373	Uncleaved	0.784084
8	0.752	1085.07	2712676		44.8813	Uncleaved	0.771387
9	0.752	1029.9	2574747		0	Cleaved
10	0.752	1031.91	2579788		0	Cleaved
11	0.752	1029.99	2574979		0	Cleaved
12	0.752	1032.2	2580501		0	Cleaved
13	0.752	1036.81	2592024		0	Cleaved
14	0.752	1043.95	2609877		3.76233	Cleaved
15	0.752	1052.04	2630099		11.8513	Cleaved
16	0.752	1053.49	2633724		13.3013	Cleaved
17	0.752	1043.83	2609567	1040.19		Background
18	0.752	1058.29	2645733			Background
19	0.752	1018.45	2546114			Background
Replicate 3
Box #	Area	Intensity	Raw Intenisty	Average Background	Background Subtracted	Contents	Uncleaved/Total
1	0.77	1344.64	3361606		263.622	Uncleaved	0.911784
2	0.77	1383.43	3458572		302.409	Uncleaved	0.937389
3	0.77	1355.76	3389398		274.739	Uncleaved	0.921984
4	0.77	1350.96	3377394		269.938	Uncleaved	0.927865
5	0.77	1312.22	3280545		231.198	Uncleaved	0.889409
6	0.77	1295.61	3239019		214.588	Uncleaved	0.895767
7	0.77	1275.62	3189048		194.599	Uncleaved	0.858513
8	0.77	1229.49	3073729		148.472	Uncleaved	0.870427
9	0.77	1225.75	3064373		144.729	Uncleaved	0.914891
10	0.77	1106.53	2766315		25.5057	Cleaved
11	0.77	1101.22	2753047		20.1987	Cleaved
12	0.77	1104.27	2760670		23.2477	Cleaved
13	0.77	1102.01	2755016		20.9857	Cleaved
14	0.77	1109.77	2774421		28.7477	Cleaved
15	0.77	1105.99	2764976		24.9697	Cleaved
16	0.77	1113.09	2782728		32.0707	Cleaved
17	0.77	1103.12	2757805		22.1017	Cleaved
18	0.77	1094.48	2736211		13.4637	Cleaved
19	0.77	1096.23	2740579	1081.02		Background
20	0.77	1084.69	2711726			Background
21	0.77	1062.14	2655348			Background

## Sheet: RNA#4,DNA
Replicate 1
Box #	Area	Intensity	Raw Intenisty	Average Background	Background Subtracted	Contents	Uncleaved/Total
1	0.742	1277.32	3193293		196.368	Uncleaved	0.831744
2	0.742	1241.47	3103667		160.518	Uncleaved	0.877891
3	0.742	1243.52	3108800		162.571	Uncleaved	0.943863
4	0.742	1218.87	3047176		137.921	Uncleaved	0.923593
5	0.742	1161.99	2904964		81.037	Uncleaved	0.832515
6	0.742	1185.38	2963439		104.427	Uncleaved	0.628257
7	0.742	1122.17	2805435		41.225	Uncleaved	0.314529
8	0.742	1114.56	2786402		33.612	Uncleaved	0.258375
9	0.742	1100.83	2752078		19.882	Uncleaved	0.150923
10	0.742	1120.67	2801682		39.724	Cleaved
11	0.742	1103.28	2758189		22.327	Cleaved
12	0.742	1090.62	2726546		9.669	Cleaved
13	0.742	1092.36	2730897		11.41	Cleaved
14	0.742	1097.25	2743129		16.303	Cleaved
15	0.742	1142.74	2856848		61.79	Cleaved
16	0.742	1170.79	2926982		89.844	Cleaved
17	0.742	1177.43	2943567		96.478	Cleaved
18	0.742	1192.8	2982008		111.854	Cleaved
19	0.742	1086.4	2716004	1080.95		Background
20	0.742	1081.64	2704096			Background
21	0.742	1074.81	2687018			Background
Replicate 2
Box #	Area	Intensity	Raw Intenisty	Average Background	Background Subtracted	Contents	Uncleaved/Total
1	0.742	1272.83	3182068		198.183	Uncleaved	0.982328
2	0.742	1333.09	3332730		258.448	Uncleaved	0.967288
3	0.742	1298.03	3245065		223.382	Uncleaved	0.932618
4	0.742	1261.9	3154742		187.253	Uncleaved	0.903115
5	0.742	1238.86	3097155		164.218	Uncleaved	0.776091
6	0.742	1175.33	2938329		100.688	Uncleaved	0.527618
7	0.742	1100.43	2751082		25.7893	Uncleaved	0.261074
8	0.742	1086.82	2717047		12.1753	Uncleaved	0.12869
9	0.742	1084.33	2710827		9.68733	Uncleaved	0.0941636
10	0.742	1078.21	2695523		3.56533	Cleaved
11	0.742	1083.38	2708460		8.74033	Cleaved
12	0.742	1090.78	2726958		16.1393	Cleaved
13	0.742	1094.73	2736830		20.0883	Cleaved
14	0.742	1122.02	2805054		47.3783	Cleaved
15	0.742	1164.79	2911978		90.1473	Cleaved
16	0.742	1147.64	2869090		72.9923	Cleaved
17	0.742	1157.08	2892696		82.4343	Cleaved
18	0.742	1167.83	2919585		93.1903	Cleaved
19	0.742	1081.29	2703221	1074.64		Background
20	0.742	1096.63	2741574			Background
21	0.742	1046.01	2615032			Background
Replicate 3
Box #	Area	Intensity	Raw Intenisty	Average Background	Background Subtracted	Contents	Uncleaved/Total
1	0.83	1367.92	3419809		162.982	Uncleaved	1
2	0.83	1387.63	3469088		182.693	Uncleaved	1
3	0.83	1346.86	3367153		141.919	Uncleaved	1
4	0.83	1350.76	3376906		145.82	Uncleaved	0.999975
5	0.83	1349.59	3373982		144.651	Uncleaved	0.91018
6	0.83	1292.04	3230088		87.0927	Uncleaved	0.55972
7	0.83	1242.62	3106544		37.6757	Uncleaved	0.296115
8	0.83	1225.41	3063536		20.4717	Uncleaved	0.185148
9	0.83	1221.32	3053302		16.3787	Uncleaved	0.14131
10	0.83	1193.33	2983327		0	Cleaved
11	0.83	1186.67	2966673		0	Cleaved
12	0.83	1187.76	2969399		0	Cleaved
13	0.83	1204.95	3012364		0.00366667	Cleaved
14	0.83	1219.22	3048043		14.2747	Cleaved
15	0.83	1273.45	3183626		68.5077	Cleaved
16	0.83	1294.5	3236249		89.5577	Cleaved
17	0.83	1295.04	3237600		90.0977	Cleaved
18	0.83	1304.47	3261174		99.5277	Cleaved
19	0.83	1209.3	3023247	1204.94		Background
20	0.83	1222.97	3057423			Background
21	0.83	1182.56	2956398			Background

## Sheet: RNA#4,Nucleosomes
Replicate 1
Box #	Area	Intensity	Raw Intenisty	Average Background	Background Subtracted	Contents	Uncleaved/Total
1	0.742	1405.71	3514279		316.492	Uncleaved	1
2	0.742	1352.92	3382311		263.704	Uncleaved	1
3	0.742	1327.14	3317860		237.924	Uncleaved	0.979674
4	0.742	1311.23	3278068		222.007	Uncleaved	0.956765
5	0.742	1305.04	3262593		215.817	Uncleaved	0.927422
6	0.742	1234.59	3086462		145.365	Uncleaved	0.79916
7	0.742	1228.27	3070675		139.05	Uncleaved	0.738876
8	0.742	1201.43	3003571		112.208	Uncleaved	0.867393
9	0.742	1172.5	2931249		83.2803	Uncleaved	0.771288
10	0.742	1085.36	2713397		0	Cleaved
11	0.742	1083.22	2708054		0	Cleaved
12	0.742	1094.16	2735390		4.93633	Cleaved
13	0.742	1099.25	2748131		10.0323	Cleaved
14	0.742	1106.11	2765272		16.8893	Cleaved
15	0.742	1125.75	2814380		36.5323	Cleaved
16	0.742	1138.36	2845903		49.1413	Cleaved
17	0.742	1106.37	2765934		17.1543	Cleaved
18	0.742	1113.91	2784788		24.6953	Cleaved
19	0.742	1106.57	2766427	1089.22		Background
20	0.742	1095.76	2739404			Background
21	0.742	1065.33	2663314			Background
Replicate 2
Box #	Area	Intensity	Raw Intenisty	Average Background	Background Subtracted	Contents	Uncleaved/Total
1	0.742	1348.56	3371399		271.606	Uncleaved	0.976756
2	0.742	1498.14	3745343		421.183	Uncleaved	0.972922
3	0.742	1386.49	3466237		309.541	Uncleaved	0.976654
4	0.742	1299.44	3248590		222.482	Uncleaved	0.963867
5	0.742	1225.18	3062940		148.222	Uncleaved	1
6	0.742	1182.9	2957255		105.948	Uncleaved	0.930108
7	0.742	1159.37	2898426		82.4163	Uncleaved	0.824983
8	0.742	1127.61	2819026		50.6563	Uncleaved	0.758434
9	0.742	1128.19	2820464		51.2323	Uncleaved	0.792718
10	0.742	1083.42	2708542		6.46333	Cleaved
11	0.742	1088.68	2721689		11.7223	Cleaved
12	0.742	1084.35	2710883		7.39933	Cleaved
13	0.742	1085.29	2713236		8.34033	Cleaved
14	0.742	1075.19	2687971		0	Cleaved
15	0.742	1084.91	2712287		7.96133	Cleaved
16	0.742	1094.44	2736094		17.4843	Cleaved
17	0.742	1093.09	2732720		16.1343	Cleaved
18	0.742	1090.35	2725876		13.3963	Cleaved
19	0.742	1095.78	2739452	1076.95		Background
20	0.742	1086.37	2715932			Background
21	0.742	1048.71	2621767			Background
Replicate 3
Box #	Area	Intensity	Raw Intenisty	Average Background	Background Subtracted	Contents	Uncleaved/Total
1	0.83	1491.71	3729283		297.581	Uncleaved	0.92656
2	0.83	1530.12	3825288		335.983	Uncleaved	0.954672
3	0.83	1532.13	3830325		337.998	Uncleaved	0.955569
4	0.83	1448.48	3621194		254.346	Uncleaved	0.937426
5	0.83	1399.7	3499253		205.569	Uncleaved	0.8976
6	0.83	1318.68	3296690		124.544	Uncleaved	0.840606
7	0.83	1262.64	3156592		68.5047	Uncleaved	0.704401
8	0.83	1263.67	3159176		69.5377	Uncleaved	0.736056
9	0.83	1251.67	3129165		57.5337	Uncleaved	0.770606
10	0.83	1217.72	3044297		23.5867	Cleaved
11	0.83	1210.09	3025212		15.9527	Cleaved
12	0.83	1209.85	3024621		15.7157	Cleaved
13	0.83	1211.11	3027775		16.9777	Cleaved
14	0.83	1217.58	3043960		23.4517	Cleaved
15	0.83	1217.75	3044371		23.6157	Cleaved
16	0.83	1222.88	3057200		28.7477	Cleaved
17	0.83	1219.07	3047669		24.9357	Cleaved
18	0.83	1211.26	3028148		17.1267	Cleaved
19	0.83	1216.43	3041076	1194.13		Background
20	0.83	1211.67	3029173			Background
21	0.83	1154.3	2885746			Background

## Sheet: RNA#5,DNA
Replicate 1
Box #	Area	Intensity	Raw Intenisty	Average Background	Background Subtracted	Contents	Uncleaved/Total
1	0.273	375.672	939181		31.5003	Uncleaved	1
2	0.273	370.492	926231		26.3203	Uncleaved	1
3	0.273	369.341	923353		25.1693	Uncleaved	0.991244
4	0.273	365.874	914686		21.7023	Uncleaved	0.834363
5	0.273	356.391	890978		12.2193	Uncleaved	0.529694
6	0.273	350.106	875264		5.93433	Uncleaved	0.279201
7	0.273	347.5	868749		3.32833	Uncleaved	0.157014
8	0.273	346	864999		1.82833	Uncleaved	0.108502
9	0.273	346.019	865048		1.84733	Uncleaved	0.105528
10	0.273	342.617	856543		0	Cleaved
11	0.273	342.263	855658		0	Cleaved
12	0.273	344.394	860986		0.222333	Cleaved
13	0.273	348.48	871200		4.30833	Cleaved
14	0.273	355.021	887552		10.8493	Cleaved
15	0.273	359.492	898731		15.3203	Cleaved
16	0.273	362.041	905102		17.8693	Cleaved
17	0.273	359.194	897985		15.0223	Cleaved
18	0.273	359.83	899575		15.6583	Cleaved
19	0.273	346.143	865357	344.172		Background
20	0.273	347.152	867880			Background
21	0.273	339.22	848049			Background
Replicate 2
Box #	Area	Intensity	Raw Intenisty	Average Background	Background Subtracted	Contents	Uncleaved/Total
1	0.273	378.968	947421		30.3567	Uncleaved	0.867548
2	0.273	382.242	955606		33.6307	Uncleaved	0.929786
3	0.273	383.652	959130		35.0407	Uncleaved	0.886402
4	0.273	375.318	938296		26.7067	Uncleaved	0.84621
5	0.273	367.577	918942		18.9657	Uncleaved	0.651398
6	0.273	357.034	892585		8.42267	Uncleaved	0.323932
7	0.273	346.256	865640		0	Uncleaved	0
8	0.273	343.143	857857		0	Uncleaved	0
9	0.273	350.144	875361		1.53267	Uncleaved	0.0653719
10	0.273	353.246	883114		4.63467	Cleaved
11	0.273	351.151	877877		2.53967	Cleaved
12	0.273	353.102	882755		4.49067	Cleaved
13	0.273	353.465	883662		4.85367	Cleaved
14	0.273	358.761	896903		10.1497	Cleaved
15	0.273	366.19	915474		17.5787	Cleaved
16	0.273	366.342	915855		17.7307	Cleaved
17	0.273	368.037	920093		19.4257	Cleaved
18	0.273	370.524	926309		21.9127	Cleaved
19	0.273	355.966	889916	348.611		Background
20	0.273	348.176	870441			Background
21	0.273	341.692	854230			Background
Replicate 3
Box #	Area	Intensity	Raw Intenisty	Average Background	Background Subtracted	Contents	Uncleaved/Total
1	0.277	382.659	956648		27.3777	Uncleaved	1
2	0.277	389.144	972861		33.8627	Uncleaved	0.94614
3	0.277	387.579	968947		32.2977	Uncleaved	0.887534
4	0.277	386.703	966758		31.4217	Uncleaved	0.832046
5	0.277	375.808	939519		20.5267	Uncleaved	0.613518
6	0.277	366.816	917041		11.5347	Uncleaved	0.348381
7	0.277	362.369	905923		7.08767	Uncleaved	0.227021
8	0.277	359.623	899058		4.34167	Uncleaved	0.156647
9	0.277	358.646	896614		3.36467	Uncleaved	0.122248
10	0.277	354.708	886770		0	Cleaved
11	0.277	357.209	893022		1.92767	Cleaved
12	0.277	359.374	898434		4.09267	Cleaved
13	0.277	361.624	904061		6.34267	Cleaved
14	0.277	368.212	920529		12.9307	Cleaved
15	0.277	376.856	942139		21.5747	Cleaved
16	0.277	379.414	948536		24.1327	Cleaved
17	0.277	378.656	946639		23.3747	Cleaved
18	0.277	379.44	948601		24.1587	Cleaved
19	0.277	357.066	892664	355.281		Background
20	0.277	355.705	889263			Background
21	0.277	353.073	882682			Background

## Sheet: RNA#5,Nucleosomes
Replicate 1
Box #	Area	Intensity	Raw Intenisty	Average Background	Background Subtracted	Contents	Uncleaved/Total
1	0.273	386.315	965788		39.419	Uncleaved	1.02422
2	0.273	384.658	961644		37.762	Uncleaved	1.05895
3	0.273	381.478	953695		34.582	Uncleaved	1.10677
4	0.273	378.567	946418		31.671	Uncleaved	1
5	0.273	373.102	932755		26.206	Uncleaved	0.774959
6	0.273	368.412	921029		21.516	Uncleaved	0.462034
7	0.273	358.191	895478		11.295	Uncleaved	0.285256
8	0.273	349.896	874741		3	Uncleaved	0.0837357
9	0.273	351.728	879319		4.832	Uncleaved	0.106568
10	0.273	345.964	864910		-0.932	Cleaved
11	0.273	344.794	861985		-2.102	Cleaved
12	0.273	343.56	858899		-3.336	Cleaved
13	0.273	344.208	860520		0	Cleaved
14	0.273	354.506	886264		7.61	Cleaved
15	0.273	371.948	929869		25.052	Cleaved
16	0.273	375.197	937993		28.301	Cleaved
17	0.273	379.723	949307		32.827	Cleaved
18	0.273	387.406	968516		40.51	Cleaved
19	0.273	353.753	884383	346.896		Background
20	0.273	348.103	870257			Background
21	0.273	338.832	847080			Background
Replicate 2
Box #	Area	Intensity	Raw Intenisty	Average Background	Background Subtracted	Contents	Uncleaved/Total
1	0.273	392.506	981264		50.39	Uncleaved	0.895504
2	0.273	410.338	1025844		68.222	Uncleaved	0.95804
3	0.273	405.592	1013981		63.476	Uncleaved	0.929575
4	0.273	389.56	973901		47.444	Uncleaved	0.932652
5	0.273	384.767	961918		42.651	Uncleaved	0.894395
6	0.273	358.34	895851		16.224	Uncleaved	0.475512
7	0.273	343.854	859634		1.738	Uncleaved	0.0729915
8	0.273	340.347	850868		0	Uncleaved	0
9	0.273	339.368	848421		0	Uncleaved	0
10	0.273	347.996	869990		5.88	Cleaved
11	0.273	345.104	862760		2.988	Cleaved
12	0.273	346.925	867313		4.809	Cleaved
13	0.273	345.542	863856		3.426	Cleaved
14	0.273	347.152	867879		5.036	Cleaved
15	0.273	360.011	900027		17.895	Cleaved
16	0.273	364.189	910473		22.073	Cleaved
17	0.273	358.379	895948		16.263	Cleaved
18	0.273	358.018	895044		15.902	Cleaved
19	0.273	349.627	874068	342.116		Background
20	0.273	341.898	854746			Background
21	0.273	334.823	837057			Background
Replicate 3
Box #	Area	Intensity	Raw Intenisty	Average Background	Background Subtracted	Contents	Uncleaved/Total
1	0.277	394.3	985749		39.6637	Uncleaved	0.944478
2	0.277	415.12	1037801		60.4837	Uncleaved	0.925544
3	0.277	412.347	1030868		57.7107	Uncleaved	0.92633
4	0.277	401.655	1004137		47.0187	Uncleaved	0.918507
5	0.277	387.98	969951		33.3437	Uncleaved	0.814227
6	0.277	377.975	944938		23.3387	Uncleaved	0.537889
7	0.277	369.28	923200		14.6437	Uncleaved	0.382898
8	0.277	362.441	906102		7.80467	Uncleaved	0.292635
9	0.277	362.393	905983		7.75667	Uncleaved	0.2621
10	0.277	356.968	892421		2.33167	Cleaved
11	0.277	359.502	898755		4.86567	Cleaved
12	0.277	359.226	898064		4.58967	Cleaved
13	0.277	358.808	897021		4.17167	Cleaved
14	0.277	362.244	905611		7.60767	Cleaved
15	0.277	374.687	936718		20.0507	Cleaved
16	0.277	378.237	945592		23.6007	Cleaved
17	0.277	373.502	933756		18.8657	Cleaved
18	0.277	376.474	941186		21.8377	Cleaved
19	0.277	356.272	890679	354.636		Background
20	0.277	356.677	891692			Background
21	0.277	350.96	877399			Background

[truncated: 2 more sheets: RNA#6,DNA, RNA#6,Nucleosomes]
