# Supplementary material for: Nucleosome breathing and remodeling constrain CRISPR-Cas9 function
Source: eLife. 2016 Apr 28;5:e13450. doi: 10.7554/eLife.13450 (PMC4880442; doi:10.7554/eLife.13450)
Supplement: Figure 2—source data 7. — DOI: http://dx.doi.org/10.7554/eLife.13450.028 [file elife-13450-fig2-data7.xlsx]

## Sheet: RNA Core 5S DNA
Replicate 1
Box #	Area	Intensity	Raw Intenisty	Average Background	Background Subtracted	Contents	Uncleaved/Total
1	0.322	706.947	1767368		213.771	Uncleaved	0.9103
2	0.322	677.914	1694786		184.738	Uncleaved	0.841916
3	0.322	627.163	1567908		133.987	Uncleaved	0.689621
4	0.322	604.859	1512148		111.683	Uncleaved	0.508038
5	0.322	509.166	1272914		15.9897	Uncleaved	0.0910821
6	0.322	494.817	1237043		1.64067	Uncleaved	0.00957923
7	0.322	494.018	1235044		0.841667	Uncleaved	0.00552335
8	0.322	492.123	1230307		-1.05333	Uncleaved	0
9	0.322	494.094	1235236		0.917667	Uncleaved	0.006655
10	0.322	514.241	1285603		21.0647	Cleaved
11	0.322	527.864	1319660		34.6877	Cleaved
12	0.322	553.48	1383699		60.3037	Cleaved
13	0.322	601.325	1503313		108.149	Cleaved
14	0.322	652.739	1631848		159.563	Cleaved
15	0.322	662.809	1657022		169.633	Cleaved
16	0.322	644.718	1611794		151.542	Cleaved
17	0.322	624.912	1562280		131.736	Cleaved
18	0.322	630.15	1575375		136.974	Cleaved
19	0.322	496.177	1240442	493.176
20	0.322	494.302	1235755
21	0.322	489.05	1222625
Replicate 2
Box #	Area	Intensity	Raw Intenisty	Average Background	Background Subtracted	Contents	Uncleaved/Total
1	0.299	635.089	1587722		180.374	Uncleaved	0.889848
2	0.299	671.519	1678798		216.804	Uncleaved	0.857065
3	0.299	626.499	1566247		171.784	Uncleaved	0.701288
4	0.299	542.75	1356876		88.035	Uncleaved	0.440415
5	0.299	471.653	1179133		16.938	Uncleaved	0.0847956
6	0.299	461.608	1154020		6.893	Uncleaved	0.0440698
7	0.299	459.32	1148300		4.605	Uncleaved	0.0288321
8	0.299	457.202	1143005		2.487	Uncleaved	0.0166712
9	0.299	456.212	1140529		1.497	Uncleaved	0.011346
10	0.299	477.043	1192608		22.328	Cleaved
11	0.299	490.872	1227180		36.157	Cleaved
12	0.299	527.886	1319715		73.171	Cleaved
13	0.299	566.571	1416428		111.856	Cleaved
14	0.299	637.528	1593821		182.813	Cleaved
15	0.299	604.233	1510583		149.518	Cleaved
16	0.299	609.828	1524571		155.113	Cleaved
17	0.299	601.407	1503517		146.692	Cleaved
18	0.299	585.159	1462897		130.444	Cleaved
19	0.299	455.854	1139634	454.715
20	0.299	453.596	1133991
21	0.299	454.695	1136737
Replicate 3
Box #	Area	Intensity	Raw Intenisty	Average Background	Background Subtracted	Contents	Uncleaved/Total
1	0.336	724.53	1811325		232.57	Uncleaved	0.884144
2	0.336	745.572	1863929		253.612	Uncleaved	0.865534
3	0.336	722.792	1806979		230.832	Uncleaved	0.782669
4	0.336	626.216	1565540		134.256	Uncleaved	0.555778
5	0.336	521.396	1303490		29.4363	Uncleaved	0.140346
6	0.336	500.415	1251038		8.45533	Uncleaved	0.051614
7	0.336	498.598	1246495		6.63833	Uncleaved	0.0528531
8	0.336	500.563	1251407		8.60333	Uncleaved	0.0659949
9	0.336	522.435	1306087		30.4753	Cleaved
10	0.336	531.36	1328401		39.4003	Cleaved
11	0.336	556.057	1390142		64.0973	Cleaved
12	0.336	599.268	1498171		107.308	Cleaved
13	0.336	672.264	1680661		180.304	Cleaved
14	0.336	647.323	1618308		155.363	Cleaved
15	0.336	610.921	1527303		118.961	Cleaved
16	0.336	613.72	1534301		121.76	Cleaved
17	0.336	494.84	1237099	491.96
18	0.336	493.92	1234799
19	0.336	487.119	1217798

## Sheet: RNA Core 5S Nucleosomes
Replicate 1
Box #	Area	Intensity	Raw Intenisty	Average Background	Background Subtracted	Contents	Uncleaved/Total
1	0.299	651.142	1627856		194.577	Uncleaved	0.865072
2	0.299	763.184	1907959		306.619	Uncleaved	0.925903
3	0.299	678.669	1696672		222.104	Uncleaved	0.923484
4	0.299	682.008	1705020		225.443	Uncleaved	0.905373
5	0.299	650.8	1626999		194.235	Uncleaved	0.889205
6	0.299	619.764	1549409		163.199	Uncleaved	0.87861
7	0.299	608.407	1521018		151.842	Uncleaved	0.893505
8	0.299	589.817	1474542		133.252	Uncleaved	0.871306
9	0.299	592.67	1481675		136.105	Uncleaved	0.88672
10	0.299	486.914	1217284		30.3487	Cleaved
11	0.299	481.103	1202757		24.5377	Cleaved
12	0.299	474.968	1187419		18.4027	Cleaved
13	0.299	480.128	1200321		23.5627	Cleaved
14	0.299	480.767	1201918		24.2017	Cleaved
15	0.299	479.113	1197782		22.5477	Cleaved
16	0.299	474.663	1186657		18.0977	Cleaved
17	0.299	476.247	1190618		19.6817	Cleaved
18	0.299	473.953	1184882		17.3877	Cleaved
19	0.299	456.312	1140779	456.565
20	0.299	455.767	1139418
21	0.299	457.617	1144043
Replicate 2
Box #	Area	Intensity	Raw Intenisty	Average Background	Background Subtracted	Contents	Uncleaved/Total
1	0.299	637.154	1592886		174.83	Uncleaved	0.944454
2	0.299	680.25	1700624		217.926	Uncleaved	0.939639
3	0.299	643.584	1608959		181.26	Uncleaved	0.910103
4	0.299	645.026	1612565		182.702	Uncleaved	0.876133
5	0.299	632.588	1581471		170.264	Uncleaved	0.885568
6	0.299	643.002	1607505		180.678	Uncleaved	0.952504
7	0.299	632.434	1581085		170.11	Uncleaved	0.956226
8	0.299	606.897	1517242		144.573	Uncleaved	0.920963
9	0.299	582.764	1456909		120.44	Uncleaved	0.920906
10	0.299	472.606	1181514		10.2823	Cleaved
11	0.299	476.323	1190807		13.9993	Cleaved
12	0.299	480.228	1200571		17.9043	Cleaved
13	0.299	488.154	1220385		25.8303	Cleaved
14	0.299	484.325	1210813		22.0013	Cleaved
15	0.299	471.333	1178332		9.00933	Cleaved
16	0.299	470.111	1175277		7.78733	Cleaved
17	0.299	474.731	1186828		12.4073	Cleaved
18	0.299	472.668	1181669		10.3443	Cleaved
19	0.299	460.348	1150871	462.324
20	0.299	462.722	1156804
21	0.299	463.901	1159752
Replicate 3
Box #	Area	Intensity	Raw Intenisty	Average Background	Background Subtracted	Contents	Uncleaved/Total
1	0.336	737.251	1843128		247.57	Uncleaved	0.982275
2	0.336	807.594	2018984		317.913	Uncleaved	0.994406
3	0.336	741.09	1852724		251.409	Uncleaved	0.985916
4	0.336	796.896	1992240		307.215	Uncleaved	0.99535
5	0.336	758.747	1896868		269.066	Uncleaved	0.99975
6	0.336	665.073	1662683		175.392	Uncleaved	0.98322
7	0.336	637.181	1592953		147.5	Uncleaved	0.947607
8	0.336	639.952	1599879		150.271	Uncleaved	0.939532
9	0.336	494.148	1235371		4.46733	Cleaved
10	0.336	491.469	1228673		1.78833	Cleaved
11	0.336	493.272	1233180		3.59133	Cleaved
12	0.336	491.116	1227789		1.43533	Cleaved
13	0.336	489.748	1224371		0.0673333	Cleaved
14	0.336	492.674	1231684		2.99333	Cleaved
15	0.336	497.836	1244590		8.15533	Cleaved
16	0.336	499.352	1248381		9.67133	Cleaved
17	0.336	486.69	1216724	489.681
18	0.336	491.62	1229050
19	0.336	490.732	1226829

## Sheet: RNA Entry 5S DNA
Replicate 1
Box #	Area	Intensity	Raw Intenisty	Average Background	Background Subtracted	Contents	Uncleaved/Total
1	0.392	769.174	1922936		224.263	Uncleaved	0.813187
2	0.392	823.522	2058806		278.611	Uncleaved	0.761878
3	0.392	796.253	1990633		251.342	Uncleaved	0.758119
4	0.392	755.896	1889740		210.985	Uncleaved	0.688214
5	0.392	716.59	1791476		171.679	Uncleaved	0.551156
6	0.392	637.271	1593178		92.3597	Uncleaved	0.317246
7	0.392	579.298	1448245		34.3867	Uncleaved	0.130962
8	0.392	570.026	1425065		25.1147	Uncleaved	0.108675
9	0.392	562.72	1406801		17.8087	Uncleaved	0.0841626
10	0.392	596.431	1491077		51.5197	Cleaved
11	0.392	631.99	1579975		87.0787	Cleaved
12	0.392	625.103	1562757		80.1917	Cleaved
13	0.392	640.495	1601238		95.5837	Cleaved
14	0.392	684.721	1711803		139.81	Cleaved
15	0.392	743.681	1859203		198.77	Cleaved
16	0.392	773.094	1932734		228.183	Cleaved
17	0.392	750.895	1877238		205.984	Cleaved
18	0.392	738.701	1846753		193.79	Cleaved
19	0.392	570.941	1427353	544.911
20	0.392	519.395	1298488
21	0.392	544.398	1360996
Replicate 2
Box #	Area	Intensity	Raw Intenisty	Average Background	Background Subtracted	Contents	Uncleaved/Total
1	0.173	539.908	1349770		288.013	Uncleaved	0.800495
2	0.173	575.856	1439639		323.961	Uncleaved	0.759168
3	0.173	498.37	1245925		246.475	Uncleaved	0.734926
4	0.173	464.875	1162188		212.98	Uncleaved	0.689919
5	0.173	429.262	1073155		177.367	Uncleaved	0.604369
6	0.173	349.734	874334		97.8387	Uncleaved	0.377835
7	0.173	296.639	741597		44.7437	Uncleaved	0.207203
8	0.173	285.109	712773		33.2137	Uncleaved	0.164221
9	0.173	281.266	703165		29.3707	Uncleaved	0.14691
10	0.173	323.676	809191		71.7807	Cleaved
11	0.173	354.666	886664		102.771	Cleaved
12	0.173	340.794	851986		88.8987	Cleaved
13	0.173	347.618	869046		95.7227	Cleaved
14	0.173	368.003	920007		116.108	Cleaved
15	0.173	413.002	1032504		161.107	Cleaved
16	0.173	423.093	1057733		171.198	Cleaved
17	0.173	420.931	1052327		169.036	Cleaved
18	0.173	422.448	1056120		170.553	Cleaved
19	0.173	247.422	618555	251.895
20	0.173	266.702	666754
21	0.173	241.562	603904
Replicate 3
Box #	Area	Intensity	Raw Intenisty	Average Background	Background Subtracted	Contents	Uncleaved/Total
1	0.173	499.552	1248880		256.99	Uncleaved	0.754256
2	0.173	463.807	1159517		221.245	Uncleaved	0.702876
3	0.173	507.606	1269016		265.044	Uncleaved	0.73497
4	0.173	443.268	1108171		200.706	Uncleaved	0.664345
5	0.173	414.732	1036831		172.17	Uncleaved	0.554954
6	0.173	344.958	862396		102.396	Uncleaved	0.360571
7	0.173	294.718	736794		52.156	Uncleaved	0.209506
8	0.173	286.662	716654		44.1	Uncleaved	0.187322
9	0.173	276.703	691757		34.141	Uncleaved	0.147458
10	0.173	326.292	815729		83.73	Cleaved
11	0.173	336.088	840220		93.526	Cleaved
12	0.173	338.137	845343		95.575	Cleaved
13	0.173	343.967	859918		101.405	Cleaved
14	0.173	380.634	951586		138.072	Cleaved
15	0.173	424.149	1060373		181.587	Cleaved
16	0.173	439.354	1098386		196.792	Cleaved
17	0.173	433.886	1084714		191.324	Cleaved
18	0.173	439.951	1099878		197.389	Cleaved
19	0.173	229.925	574813	242.562
20	0.173	231.494	578734
21	0.173	266.267	665667

## Sheet: RNA Entry 5S Nucleosomes
Replicate 1
Box #	Area	Intensity	Raw Intenisty	Average Background	Background Subtracted	Contents	Uncleaved/Total
1	0.354	750.458	1876145		263.932	Uncleaved	0.747679
2	0.354	803.175	2007938		316.649	Uncleaved	0.795483
3	0.354	748.478	1871196		261.952	Uncleaved	0.76334
4	0.354	735.631	1839077		249.105	Uncleaved	0.752399
5	0.354	689.15	1722875		202.624	Uncleaved	0.701073
6	0.354	656.738	1641845		170.212	Uncleaved	0.551991
7	0.354	587.538	1468846		101.012	Uncleaved	0.378898
8	0.354	572.755	1431888		86.2287	Uncleaved	0.334738
9	0.354	564.977	1412443		78.4507	Uncleaved	0.333085
10	0.354	575.596	1438990		89.0697	Cleaved
11	0.354	567.936	1419839		81.4097	Cleaved
12	0.354	567.74	1419350		81.2137	Cleaved
13	0.354	568.502	1421256		81.9757	Cleaved
14	0.354	572.922	1432305		86.3957	Cleaved
15	0.354	624.674	1561685		138.148	Cleaved
16	0.354	652.108	1630270		165.582	Cleaved
17	0.354	657.898	1644745		171.372	Cleaved
18	0.354	643.603	1609007		157.077	Cleaved
19	0.354	514.438	1286095	486.526
20	0.354	476.72	1191800
21	0.354	468.421	1171052
Replicate 2
Box #	Area	Intensity	Raw Intenisty	Average Background	Background Subtracted	Contents	Uncleaved/Total
1	0.173	540.67	1351674		298.26	Uncleaved	0.774013
2	0.173	496.399	1240997		253.989	Uncleaved	0.734847
3	0.173	501.985	1254962		259.575	Uncleaved	0.739481
4	0.173	486.524	1216309		244.114	Uncleaved	0.727209
5	0.173	454.772	1136930		212.362	Uncleaved	0.666899
6	0.173	405.548	1013870		163.138	Uncleaved	0.534714
7	0.173	362.499	906248		120.089	Uncleaved	0.426106
8	0.173	347.288	868220		104.878	Uncleaved	0.390032
9	0.173	341.868	854671		99.4583	Uncleaved	0.381945
10	0.173	329.492	823731		87.0823	Cleaved
11	0.173	334.056	835139		91.6463	Cleaved
12	0.173	333.858	834644		91.4483	Cleaved
13	0.173	333.982	834955		91.5723	Cleaved
14	0.173	348.48	871200		106.07	Cleaved
15	0.173	384.366	960914		141.956	Cleaved
16	0.173	404.15	1010376		161.74	Cleaved
17	0.173	406.428	1016070		164.018	Cleaved
18	0.173	403.351	1008377		160.941	Cleaved
19	0.173	232.38	580950	242.41
20	0.173	230.733	576833
21	0.173	264.116	660291
Replicate 3
Box #	Area	Intensity	Raw Intenisty	Average Background	Background Subtracted	Contents	Uncleaved/Total
1	0.173	503.988	1259971		259.352	Uncleaved	0.735996
2	0.173	469.846	1174616		225.21	Uncleaved	0.729815
3	0.173	471.629	1179072		226.993	Uncleaved	0.71612
4	0.173	449.435	1123587		204.799	Uncleaved	0.68339
5	0.173	434.13	1085325		189.494	Uncleaved	0.655507
6	0.173	399.006	997516		154.37	Uncleaved	0.533184
7	0.173	355.416	888541		110.78	Uncleaved	0.417742
8	0.173	338.76	846899		94.1243	Uncleaved	0.38661
9	0.173	329.208	823019		84.5723	Uncleaved	0.369298
10	0.173	337.666	844166		93.0303	Cleaved
11	0.173	328.011	820028		83.3753	Cleaved
12	0.173	334.619	836548		89.9833	Cleaved
13	0.173	339.518	848795		94.8823	Cleaved
14	0.173	344.222	860555		99.5863	Cleaved
15	0.173	379.791	949477		135.155	Cleaved
16	0.173	399.044	997611		154.408	Cleaved
17	0.173	393.972	984930		149.336	Cleaved
18	0.173	389.072	972681		144.436	Cleaved
19	0.173	232.876	582191	244.636
20	0.173	234.225	585563
21	0.173	266.806	667015
