# Supplementary material for: Nucleosome breathing and remodeling constrain CRISPR-Cas9 function
Source: eLife. 2016 Apr 28;5:e13450. doi: 10.7554/eLife.13450 (PMC4880442; doi:10.7554/eLife.13450)
Supplement: Figure 2—source data 8. — DOI: http://dx.doi.org/10.7554/eLife.13450.029 [file elife-13450-fig2-data8.xlsx]

## Sheet: RNA Entry 601 DNA
Replicate 1
Box #	Area	Intensity	Raw Intenisty	Average Background	Background Subtracted	Contents	Uncleaved/Total
1	0.367	903.082	2257705		341.413	Uncleaved	0.95973
2	0.367	875.497	2188743		313.828	Uncleaved	0.961837
3	0.367	860.919	2152298		299.25	Uncleaved	0.912282
4	0.367	805.105	2012763		243.436	Uncleaved	0.847858
5	0.367	748.835	1872087		187.166	Uncleaved	0.592716
6	0.367	650.186	1625465		88.517	Uncleaved	0.326676
7	0.367	609.713	1524282		48.044	Uncleaved	0.247073
8	0.367	621.362	1553406		59.693	Uncleaved	0.343587
9	0.367	640.8	1602001		79.131	Uncleaved	0.391084
10	0.367	588.818	1472044	561.669
11	0.367	523.987	1309967
12	0.367	572.202	1430506
13	0.645	983.42	2458551		14.3257	Cleaved
14	0.645	981.546	2453864		12.4517	Cleaved
15	0.645	997.868	2494670		28.7737	Cleaved
16	0.645	1012.78	2531943		43.6827	Cleaved
17	0.645	1097.7	2744263		128.611	Cleaved
18	0.645	1151.54	2878850		182.446	Cleaved
19	0.645	1115.5	2788758		146.409	Cleaved
20	0.645	1083.14	2707840		114.042	Cleaved
21	0.645	1092.3	2730752		123.207	Cleaved
22	0.645	977.052	2442631	969.094
23	0.645	958.997	2397492
24	0.645	971.234	2428086
Replicate 2
Box #	Area	Intensity	Raw Intenisty	Average Background	Background Subtracted	Contents	Uncleaved/Total
1	0.392	929.605	2324012		343.848	Uncleaved	1
2	0.392	911.877	2279693		326.12	Uncleaved	1
3	0.392	893.513	2233782		307.756	Uncleaved	0.935256
4	0.392	824.287	2060718		238.53	Uncleaved	0.793595
5	0.392	809.876	2024689		224.119	Uncleaved	0.656848
6	0.392	729.934	1824835		144.177	Uncleaved	0.448258
7	0.392	631.266	1578164		45.5087	Uncleaved	0.225118
8	0.392	649.498	1623745		63.7407	Uncleaved	0.292309
9	0.392	622.369	1555922		36.6117	Uncleaved	0.193029
10	0.392	601.48	1503700	585.757
11	0.392	549.516	1373790
12	0.392	606.276	1515691
13	0.678	1006.67	2516685		0	Cleaved
14	0.678	1023.41	2558527		0	Cleaved
15	0.678	1047.03	2617581		21.3047	Cleaved
16	0.678	1087.77	2719414		62.0387	Cleaved
17	0.678	1142.81	2857031		117.085	Cleaved
18	0.678	1203.19	3007970		177.461	Cleaved
19	0.678	1182.37	2955932		156.646	Cleaved
20	0.678	1180.05	2950114		154.319	Cleaved
21	0.678	1178.79	2946962		153.058	Cleaved
22	0.678	1025.69	2564233	1025.73
23	0.678	1023.6	2558998
24	0.678	1027.89	2569726
Replicate 3
Box #	Area	Intensity	Raw Intenisty	Average Background	Background Subtracted	Contents	Uncleaved/Total
1	0.258	628.463	1571157		228.525	Uncleaved	0.873148
2	0.258	659.672	1649181		259.734	Uncleaved	0.815849
3	0.258	610.196	1525491		210.258	Uncleaved	0.795283
4	0.258	574.858	1437146		174.92	Uncleaved	0.715041
5	0.258	518.957	1297393		119.019	Uncleaved	0.520346
6	0.258	482.993	1207483		83.0547	Uncleaved	0.372145
7	0.258	451.955	1129888		52.0167	Uncleaved	0.25331
8	0.258	427.977	1069942		28.0387	Uncleaved	0.169227
9	0.258	434.761	1086902		34.8227	Uncleaved	0.183539
10	0.258	407.762	1019405	399.938
11	0.258	393.252	983129
12	0.258	398.801	997002
13	0.57	918.32	2295801		33.2003	Cleaved
14	0.57	943.746	2359366		58.6263	Cleaved
15	0.57	939.243	2348108		54.1233	Cleaved
16	0.57	954.829	2387073		69.7093	Cleaved
17	0.57	994.831	2487077		109.711	Cleaved
18	0.57	1025.24	2563108		140.123	Cleaved
19	0.57	1038.45	2596127		153.331	Cleaved
20	0.57	1022.77	2556921		137.648	Cleaved
21	0.57	1040.03	2600066		154.906	Cleaved
22	0.57	875.148	2187870	885.12
23	0.57	902.726	2256815
24	0.57	877.485	2193713

## Sheet: RNA Entry 601 Nucleosomes
Replicate 1
Box #	Area	Intensity	Raw Intenisty	Average Background	Background Subtracted	Contents	Uncleaved/Total
1	0.317	785.061	1962653		307.49	Uncleaved	1
2	0.317	746.037	1865092		268.466	Uncleaved	0.932463
3	0.317	741.827	1854567		264.256	Uncleaved	0.931349
4	0.317	727.028	1817569		249.457	Uncleaved	0.96723
5	0.317	705.112	1762780		227.541	Uncleaved	1
6	0.317	690.483	1726208		212.912	Uncleaved	0.974467
7	0.317	671.793	1679482		194.222	Uncleaved	1
8	0.317	669.466	1673665		191.895	Uncleaved	0.97807
9	0.317	668.037	1670093		190.466	Uncleaved	0.965555
10	0.317	492.046	1230116	477.571
11	0.317	454.58	1136450
12	0.317	486.086	1215215
13	0.645	955.161	2387902		0	Cleaved
14	0.645	977.179	2442947		19.4447	Cleaved
15	0.645	977.213	2443032		19.4787	Cleaved
16	0.645	966.186	2415465		8.45167	Cleaved
17	0.645	957.387	2393467		0	Cleaved
18	0.645	963.313	2408282		5.57867	Cleaved
19	0.645	956.764	2391910		0	Cleaved
20	0.645	962.037	2405092		4.30267	Cleaved
21	0.645	964.529	2411322		6.79467	Cleaved
22	0.645	944.1	2360249	957.734
23	0.645	970.917	2427293
24	0.645	958.186	2395464
Replicate 2
Box #	Area	Intensity	Raw Intenisty	Average Background	Background Subtracted	Contents	Uncleaved/Total
1	0.317	788.999	1972497		313.487	Uncleaved	0.937493
2	0.317	743.231	1858077		267.719	Uncleaved	0.925964
3	0.317	745.158	1862896		269.646	Uncleaved	0.913612
4	0.317	713.636	1784089		238.124	Uncleaved	0.912466
5	0.317	727.784	1819461		252.272	Uncleaved	0.895262
6	0.317	709.025	1772562		233.513	Uncleaved	0.866498
7	0.317	696.012	1740031		220.5	Uncleaved	0.835254
8	0.317	644.622	1611554		169.11	Uncleaved	0.818061
9	0.317	637.55	1593875		162.038	Uncleaved	0.944147
10	0.317	492.413	1231033	475.512
11	0.317	492.76	1231899
12	0.317	441.362	1103404
13	0.762	1152.17	2880427		20.9017	Cleaved
14	0.762	1152.67	2881688		21.4057	Cleaved
15	0.762	1156.77	2891914		25.4967	Cleaved
16	0.762	1154.11	2885282		22.8437	Cleaved
17	0.762	1160.78	2901958		29.5137	Cleaved
18	0.762	1167.25	2918118		35.9777	Cleaved
19	0.762	1174.76	2936902		43.4917	Cleaved
20	0.762	1168.88	2922199		37.6107	Cleaved
21	0.762	1140.86	2852138		9.58567	Cleaved
22	0.762	1126.36	2815905	1131.27
23	0.762	1136.42	2841057
24	0.762	1131.02	2827558
Replicate 3
Box #	Area	Intensity	Raw Intenisty	Average Background	Background Subtracted	Contents	Uncleaved/Total
1	0.238	540.091	1350228		164.508	Uncleaved	0.990002
2	0.238	587.268	1468171		211.685	Uncleaved	0.927051
3	0.238	580.116	1450290		204.533	Uncleaved	0.892497
4	0.238	584.61	1461525		209.027	Uncleaved	0.968802
5	0.238	552.89	1382224		177.307	Uncleaved	0.957328
6	0.238	541.955	1354887		166.372	Uncleaved	0.922284
7	0.238	531.827	1329567		156.244	Uncleaved	0.948322
8	0.238	516.709	1291773		141.126	Uncleaved	0.914518
9	0.238	520.689	1301723		145.106	Uncleaved	0.897432
10	0.238	393.498	983746	375.583
11	0.238	372.939	932347
12	0.238	360.311	900777
13	0.581	890.382	2225956		1.66133	Cleaved
14	0.581	905.378	2263444		16.6573	Cleaved
15	0.581	913.357	2283393		24.6363	Cleaved
16	0.581	895.452	2238631		6.73133	Cleaved
17	0.581	896.624	2241561		7.90333	Cleaved
18	0.581	902.74	2256850		14.0193	Cleaved
19	0.581	897.235	2243087		8.51433	Cleaved
20	0.581	901.912	2254779		13.1913	Cleaved
21	0.581	905.305	2263262		16.5843	Cleaved
22	0.581	947.444	2368611	888.721
23	0.581	861.014	2152536
24	0.581	857.704	2144260
