# Supplementary material for: Nucleosome breathing and remodeling constrain CRISPR-Cas9 function
Source: eLife. 2016 Apr 28;5:e13450. doi: 10.7554/eLife.13450 (PMC4880442; doi:10.7554/eLife.13450)
Supplement: Figure 3—source data 4. — DOI: http://dx.doi.org/10.7554/eLife.13450.035 [file elife-13450-fig3-data4.xlsx]

## Sheet: DNA,-Snf2h,Rep1
80/80 DNA
Without Snf2h
Replicate 1
Time Point (min)	Fraction	Box Area	Intensity	Intensity - Average Background		Uncleaved/Total
0	Uncleaved	0.146	211.858	27.5063		1
0.25	Uncleaved	0.146	205.245	20.8933		1
0.5	Uncleaved	0.146	208.645	24.2933		1
1	Uncleaved	0.146	212.696	28.3443		1
3	Uncleaved	0.146	206.372	22.0203		0.965056
10	Uncleaved	0.146	201.31	16.9583		0.690974
30	Uncleaved	0.146	192.163	7.81133		0.320535
60	Uncleaved	0.146	189.218	4.86633		0.209714
120	Uncleaved	0.146	189.708	5.35633		0.19632
0	Cleaved	0.146	182.48	0
0.25	Cleaved	0.146	182.042	0
0.5	Cleaved	0.146	182.52	0
1	Cleaved	0.146	183.76	0
3	Cleaved	0.146	185.149	0.797333
10	Cleaved	0.146	191.936	7.58433
30	Cleaved	0.146	200.91	16.5583
60	Cleaved	0.146	202.69	18.3383
120	Cleaved	0.146	206.279	21.9273
N/A	Background	0.146	183.088
N/A	Background	0.146	182.288
N/A	Background	0.146	187.679
Average Background
184.352

## Sheet: Nucleosomes,-Snf2h,Rep1
80/80 Nucleosomes
Without Snf2h
Replicate 1
Time Point (min)	Fraction	Box Area	Intensity	Intensity - Average Background		Uncleaved/Total
0	Uncleaved	0.146	222.956	36.567		1
0.25	Uncleaved	0.146	223.382	36.993		1
0.5	Uncleaved	0.146	222.589	36.2		1
1	Uncleaved	0.146	226.788	40.399		1
3	Uncleaved	0.146	226.126	39.737		1
10	Uncleaved	0.146	226.504	40.115		0.975607
30	Uncleaved	0.146	220.402	34.013		1
60	Uncleaved	0.146	222.526	36.137		0.966127
120	Uncleaved	0.146	222.242	35.853		1
0	Cleaved	0.146	182.919	0
0.25	Cleaved	0.146	183.93	0
0.5	Cleaved	0.146	183.024	0
1	Cleaved	0.146	184.07	0
3	Cleaved	0.146	185.018	0
10	Cleaved	0.146	187.392	1.003
30	Cleaved	0.146	183.351	0
60	Cleaved	0.146	187.656	1.267
120	Cleaved	0.146	185.994	0
N/A	Background	0.146	185.057
N/A	Background	0.146	187.757
N/A	Background	0.146	186.353
Average Background
186.389

## Sheet: DNA, +Snf2h, Rep1
80/80 DNA
With Snf2h
Replicate 1
Time Point (min)	Fraction	Box Area	Intensity	Intensity - Average Background		Uncleaved/Total
0	Uncleaved	0.146	214.635	27.124		0.970343
0.25	Uncleaved	0.146	213.77	26.259		0.927716
0.5	Uncleaved	0.146	211.452	23.941		0.951172
1	Uncleaved	0.146	212.302	24.791		1
3	Uncleaved	0.146	209.378	21.867		0.869567
10	Uncleaved	0.146	204.37	16.859		0.855439
30	Uncleaved	0.146	199.758	12.247		0.593506
60	Uncleaved	0.146	195.184	7.673		0.41717
120	Uncleaved
0	Cleaved	0.146	188.34	0.829
0.25	Cleaved	0.146	189.557	2.046
0.5	Cleaved	0.146	188.74	1.229
1	Cleaved	0.146	186.573	0
3	Cleaved	0.146	190.791	3.28
10	Cleaved	0.146	190.36	2.849
30	Cleaved	0.146	195.899	8.388
60	Cleaved	0.146	198.231	10.72
120	Cleaved
N/A	Background	0.146	187.912
N/A	Background	0.146	187.279
N/A	Background	0.146	187.342
Average Background
187.511

## Sheet: Nucleosomes, +Snf2h, Rep1
80/80 Nucleosomes
With Snf2h
Replicate 1
Time Point (min)	Fraction	Box Area	Intensity	Intensity - Average Background		Uncleaved/Total
0	Uncleaved	0.146	220.905	35.0543		1
0.25	Uncleaved	0.146	229.106	43.2553		1
0.5	Uncleaved	0.146	219.441	33.5903		1
1	Uncleaved	0.146	224.098	38.2473		0.925622
3	Uncleaved	0.146	221.056	35.2053		0.977528
10	Uncleaved	0.146	217.232	31.3813		0.987746
30	Uncleaved	0.146	231.718	45.8673		0.847674
60	Uncleaved	0.146	210.494	24.6433		0.660243
120	Uncleaved	0.146	214.99	29.1393		0.56748
0	Cleaved	0.146	183.65	0
0.25	Cleaved	0.146	184.627	0
0.5	Cleaved	0.146	185.769	0
1	Cleaved	0.146	188.924	3.07333
3	Cleaved	0.146	186.66	0.809333
10	Cleaved	0.146	186.24	0.389333
30	Cleaved	0.146	194.093	8.24233
60	Cleaved	0.146	198.532	12.6813
120	Cleaved	0.146	208.06	22.2093
N/A	Background	0.146	188.628
N/A	Background	0.146	183.675
N/A	Background	0.146	185.249
Average Background
185.851

## Sheet: DNA, -Snf2h, Rep2
80/80 DNA
Without Snf2h
Replicate 2
Time Point (min)	Fraction	Box Area	Intensity	Intensity - Average Background		Uncleaved/Total
0	Uncleaved	0.269	723.326	244.482		0.713037
0.25	Uncleaved	0.269	666.281	187.437		0.874283
0.5	Uncleaved	0.269	605.196	126.352		1
1	Uncleaved	0.269	592.142	113.298		0.954954
3	Uncleaved	0.269	609.052	130.208		0.920398
10	Uncleaved	0.269	592.578	113.734		0.695152
30	Uncleaved	0.269	513.226	34.3823		0.315861
60	Uncleaved	0.269	487.547	8.70333		0.0835793
120	Uncleaved	0.269	495.282	16.4383		0.177626
0	Cleaved	0.269	577.236	98.3923
0.25	Cleaved	0.269	505.796	26.9523
0.5	Cleaved	0.269	475.878	0
1	Cleaved	0.269	484.188	5.34433
3	Cleaved	0.269	490.105	11.2613
10	Cleaved	0.269	528.72	49.8763
30	Cleaved	0.269	553.314	74.4703
60	Cleaved	0.269	574.273	95.4293
120	Cleaved	0.269	554.95	76.1063
N/A	Background	0.269	513.338
N/A	Background	0.269	461.018
N/A	Background	0.269	462.175
Average Background
478.844

## Sheet: Nucleosomes, -Snf2h, Rep2
80/80 Nucleosomes
Without Snf2h
Replicate 2
Time Point (min)	Fraction	Box Area	Intensity	Intensity - Average Background		Uncleaved/Total
0	Uncleaved	0.269	637.173	182.419		1
0.25	Uncleaved	0.269	615.052	160.298		1
0.5	Uncleaved	0.269	629.612	174.858		1
1	Uncleaved	0.269	610.799	156.045		1
3	Uncleaved	0.269	622.682	167.928		0.983786
10	Uncleaved	0.269	640.332	185.578		0.860653
30	Uncleaved	0.269	629.07	174.316		0.961278
60	Uncleaved	0.269	629.091	174.337		0.915671
120	Uncleaved	0.269	576.268	121.514		0.504779
0	Cleaved	0.269	441.426	0
0.25	Cleaved	0.269	445.294	0
0.5	Cleaved	0.269	445.173	0
1	Cleaved	0.269	438.807	0
3	Cleaved	0.269	457.522	2.76767
10	Cleaved	0.269	484.801	30.0467
30	Cleaved	0.269	461.776	7.02167
60	Cleaved	0.269	470.81	16.0557
120	Cleaved	0.269	573.967	119.213
N/A	Background	0.269	465.334
N/A	Background	0.269	459.614
N/A	Background	0.269	439.315
Average Background
454.754

## Sheet: DNA, +Snf2h,Rep2
80/80 DNA
With Snf2h
Replicate 2
Time Point (min)	Fraction	Box Area	Intensity	Intensity - Average Background		Uncleaved/Total
0	Uncleaved	0.322	718.152	180.828		0.805415
0.25	Uncleaved	0.322	667.51	130.186		0.948274
0.5	Uncleaved	0.322	687.606	150.282		1
1	Uncleaved	0.322	695.842	158.518		0.936357
3	Uncleaved	0.322	701.253	163.929		0.784547
10	Uncleaved	0.322	679.9	142.576		0.63144
30	Uncleaved	0.322	678.975	141.651		0.541514
60	Uncleaved	0.322	646.853	109.529		0.421065
120	Uncleaved	0.322	618.429	81.1053		0.275584
0	Cleaved	0.322	581.011	43.6873
0.25	Cleaved	0.322	544.425	7.10133
0.5	Cleaved	0.322	531.206	0
1	Cleaved	0.322	548.098	10.7743
3	Cleaved	0.322	582.342	45.0183
10	Cleaved	0.322	620.543	83.2193
30	Cleaved	0.322	657.256	119.932
60	Cleaved	0.322	687.919	150.595
120	Cleaved	0.322	750.522	213.198
N/A	Background	0.322	529.923
N/A	Background	0.322	558.587
N/A	Background	0.322	523.461
Average Background
537.324

## Sheet: Nucleosomes,+Snf2h,Rep2
80/80 Nucleosomes
With Snf2h
Replicate 2
Time Point (min)	Fraction	Box Area	Intensity	Intensity - Average Background		Uncleaved/Total
0	Uncleaved	0.322	769.671	216.087		0.957711
0.25	Uncleaved	0.322	754.522	200.938		0.963946
0.5	Uncleaved	0.322	769.416	215.832		0.932265
1	Uncleaved	0.322	770.082	216.498		0.974572
3	Uncleaved	0.322	750.273	196.689		0.912411
10	Uncleaved	0.322	786.534	232.95		0.716681
30	Uncleaved	0.322	756.884	203.3		0.598721
60	Uncleaved	0.322	755.31	201.726		0.73901
120	Uncleaved			0
0	Cleaved	0.322	563.126	9.54167
0.25	Cleaved	0.322	561.1	7.51567
0.5	Cleaved	0.322	569.266	15.6817
1	Cleaved	0.322	559.233	5.64867
3	Cleaved	0.322	572.466	18.8817
10	Cleaved	0.322	645.674	92.0897
30	Cleaved	0.322	689.841	136.257
60	Cleaved	0.322	624.826	71.2417
120	Cleaved
N/A	Background	0.322	552.577
N/A	Background	0.322	572.345
N/A	Background	0.322	535.831
Average Background
553.584

## Sheet: DNA,-Snf2h,Rep3
80/80 DNA
Without Snf2h
Replicate 3
Time Point (min)	Fraction	Box Area	Intensity	Intensity - Average Background		Uncleaved/Total
0	Uncleaved	0.346	675.982	96.01		1
0.25	Uncleaved	0.346	648.317	68.345		1
0.5	Uncleaved	0.346	658.57	78.598		0.871211
1	Uncleaved	0.346	677.266	97.294		0.775387
3	Uncleaved	0.346	642.978	63.006		0.668024
10	Uncleaved	0.346	620.907	40.935		0.477248
30	Uncleaved	0.346	599.304	19.332		0.283398
60	Uncleaved	0.346	590.763	10.791		0.183013
120	Uncleaved	0.346	585.805	5.833		0.0989466
0	Cleaved	0.346	576.685	0
0.25	Cleaved	0.346	579.204	0
0.5	Cleaved	0.346	591.591	11.619
1	Cleaved	0.346	608.156	28.184
3	Cleaved	0.346	611.283	31.311
10	Cleaved	0.346	624.81	44.838
30	Cleaved	0.346	628.855	48.883
60	Cleaved	0.346	628.144	48.172
120	Cleaved	0.346	633.09	53.118
N/A	Background	0.346	575.492
N/A	Background	0.346	580.271
N/A	Background	0.346	584.153
Average Background
579.972

## Sheet: Nucleosomes, -Snf2h, Rep3
80/80 Nucleosomes
Without Snf2h
Replicate 3
Time Point (min)	Fraction	Box Area	Intensity	Intensity - Average Background		Uncleaved/Total
0	Uncleaved	0.346	695.696	101.733		1
0.25	Uncleaved	0.346	667.24	73.277		1
0.5	Uncleaved	0.346	665.816	71.853		1
1	Uncleaved	0.346	690.75	96.787		0.884473
3	Uncleaved	0.346	681.838	87.875		0.784248
10	Uncleaved	0.346	698.887	104.924		0.889805
30	Uncleaved	0.346	694.312	100.349		0.99995
60	Uncleaved	0.346	667.351	73.388		1
120	Uncleaved	0.346	650.787	56.824		1
0	Cleaved	0.346	582.778	0
0.25	Cleaved	0.346	582.338	0
0.5	Cleaved	0.346	586.257	0
1	Cleaved	0.346	606.605	12.642
3	Cleaved	0.346	618.138	24.175
10	Cleaved	0.346	606.957	12.994
30	Cleaved	0.346	593.968	0.005
60	Cleaved	0.346	591.98	0
120	Cleaved	0.346	588.957	0
N/A	Background	0.346	585.252
N/A	Background	0.346	601.488
N/A	Background	0.346	595.149
Average Background
593.963

[truncated: 2 more sheets: DNA, +Snf2h, Rep3, Nucleosomes,+Snf2h,Rep3]
