# Supplementary material for: Nucleosome breathing and remodeling constrain CRISPR-Cas9 function
Source: eLife. 2016 Apr 28;5:e13450. doi: 10.7554/eLife.13450 (PMC4880442; doi:10.7554/eLife.13450)
Supplement: Figure 3—source data 8. — DOI: http://dx.doi.org/10.7554/eLife.13450.039 [file elife-13450-fig3-data8.xlsx]

## Sheet: DNA -RSC
80/80 DNA
Without RSC
Replicate 1
Time Point (min)	Fraction	Box Area	Intensity	Intensity - Average Background		Uncleaved/Total
0	Uncleaved	0.358	735.017	224.585		0.964682
0.25	Uncleaved	0.358	722.888	212.456		0.955707
0.5	Uncleaved	0.358	696.048	185.616		0.974667
1	Uncleaved	0.358	708.159	197.727		0.909904
3	Uncleaved	0.358	674.274	163.842		0.826581
10	Uncleaved	0.358	646.26	135.828		0.608037
30	Uncleaved	0.358	603.998	93.5657		0.402248
60	Uncleaved	0.358	556.643	46.2107		0.192226
120	Uncleaved	0.358	539.814	29.3817		0.128505
N/A	Background	0.358	522.899
N/A	Background	0.358	500.205
N/A	Background	0.358	508.193
	Avg Background	510.432
0	Cleaved	0.264	400.24	8.22233
0.25	Cleaved	0.264	401.864	9.84633
0.5	Cleaved	0.264	396.842	4.82433
1	Cleaved	0.264	411.596	19.5783
3	Cleaved	0.264	426.392	34.3743
10	Cleaved	0.264	479.577	87.5593
30	Cleaved	0.264	531.059	139.041
60	Cleaved	0.264	586.205	194.187
120	Cleaved	0.264	591.279	199.261
N/A	Background	0.264	381.171
N/A	Background	0.264	387.681
N/A	Background	0.264	407.201
	Avg Background	392.018
Replicate 2
Time Point (min)	Fraction	Box Area	Intensity	Intensity - Average Background		Uncleaved/Total
0	Uncleaved	0.264	626.66	250.102		0.924077
0.25	Uncleaved	0.264	627.058	250.5		0.930536
0.5	Uncleaved	0.264	612.306	235.748		0.946735
1	Uncleaved	0.264	623.457	246.899		0.955426
3	Uncleaved	0.264	618.59	242.032		0.891027
10	Uncleaved	0.264	601.536	224.978		0.748501
30	Uncleaved	0.264	545.14	168.582		0.536116
60	Uncleaved	0.264	466.506	89.9483		0.282018
120	Uncleaved	0.264	415.704	39.1463		0.123381
N/A	Background	0.264	373.397
N/A	Background	0.264	373.04
N/A	Background	0.264	383.236
	Avg Background	376.558
0	Cleaved	0.35	522.958	20.5487
0.25	Cleaved	0.35	521.109	18.6997
0.5	Cleaved	0.35	515.673	13.2637
1	Cleaved	0.35	513.928	11.5187
3	Cleaved	0.35	532.01	29.6007
10	Cleaved	0.35	578.003	75.5937
30	Cleaved	0.35	648.278	145.869
60	Cleaved	0.35	731.406	228.997
120	Cleaved	0.35	780.542	278.133
N/A	Background	0.35	493.68
N/A	Background	0.35	510.554
N/A	Background	0.35	502.994
	Avg Background	502.409
Replicate 3
Time Point (min)	Fraction	Box Area	Intensity	Intensity - Average Background		Uncleaved/Total
0	Uncleaved	0.35	720.418	212.983		0.97365
0.25	Uncleaved	0.35	711.076	203.641		0.993293
0.5	Uncleaved	0.35	711.054	203.619		0.983676
1	Uncleaved	0.35	695.026	187.591		0.9512
3	Uncleaved	0.35	705.028	197.593		0.912636
10	Uncleaved	0.35	684.322	176.887		0.749766
30	Uncleaved	0.35	648.055	140.62		0.553502
60	Uncleaved	0.35	562.797	55.362		0.202403
120	Uncleaved	0.35	535.736	28.301		0.102904
N/A	Background	0.35	506.489
N/A	Background	0.35	511.742
N/A	Background	0.35	504.074
	Avg Background	507.435
0	Cleaved	0.343	516.934	5.764
0.25	Cleaved	0.343	512.545	1.375
0.5	Cleaved	0.343	514.549	3.379
1	Cleaved	0.343	520.794	9.624
3	Cleaved	0.343	530.085	18.915
10	Cleaved	0.343	570.206	59.036
30	Cleaved	0.343	624.605	113.435
60	Cleaved	0.343	729.332	218.162
120	Cleaved	0.343	757.891	246.721
N/A	Background	0.343	508.435
N/A	Background	0.343	503.075
N/A	Background	0.343	522
	Avg Background	511.17

## Sheet: Nucleosomes -RSC
80/80 Nucleosomes
Without RSC
Replicate 1
Time Point (min)	Fraction	Box Area	Intensity	Intensity - Average Background		Uncleaved/Total
0	Uncleaved	0.277	508.934	116.128		0.948722
0.25	Uncleaved	0.277	503.235	110.429		1
0.5	Uncleaved	0.277	519.957	127.151		0.993385
1	Uncleaved	0.277	522.855	130.049		0.977153
3	Uncleaved	0.277	517.636	124.83		1
10	Uncleaved	0.277	507.488	114.682		1
30	Uncleaved	0.277	522.093	129.287		1
60	Uncleaved	0.277	511.506	118.7		0.965365
120	Uncleaved	0.277	512.852	120.046		1
N/A	Background	0.277	391.387
N/A	Background	0.277	393.562
N/A	Background	0.277	393.468
	Avg Background	392.806
0	Cleaved	0.245	381.598	6.27667
0.25	Cleaved	0.245	372.846	0
0.5	Cleaved	0.245	376.168	0.846667
1	Cleaved	0.245	378.362	3.04067
3	Cleaved	0.245	366.388	0
10	Cleaved	0.245	374.076	0
30	Cleaved	0.245	372.721	0
60	Cleaved	0.245	379.58	4.25867
120	Cleaved	0.245	371.414	0
N/A	Background	0.245	367.811
N/A	Background	0.245	379.165
N/A	Background	0.245	378.988
	Avg Background	375.321
Replicate 2
Time Point (min)	Fraction	Box Area	Intensity	Intensity - Average Background		Uncleaved/Total
0	Uncleaved	0.198	391.532	111.363		1
0.25	Uncleaved	0.198	404.369	124.2		0.994754
0.5	Uncleaved	0.198	409.281	129.112		0.991986
1	Uncleaved	0.198	404.924	124.755		0.975685
3	Uncleaved	0.198	403.294	123.125		0.979359
10	Uncleaved	0.198	413.164	132.995		0.96247
30	Uncleaved	0.198	410.158	129.989		0.939763
60	Uncleaved	0.198	408.278	128.109		0.923042
120	Uncleaved	0.198	399.466	119.297		0.928042
N/A	Background	0.198	280.691
N/A	Background	0.198	279.268
N/A	Background	0.198	280.547
	Avg Background	280.169
0	Cleaved	0.198	287.186
0.25	Cleaved	0.198	288.956
0.5	Cleaved	0.198	289.344
1	Cleaved	0.198	291.41
3	Cleaved	0.198	290.896
10	Cleaved	0.198	293.487
30	Cleaved	0.198	296.633
60	Cleaved	0.198	298.982
120	Cleaved	0.198	297.551
N/A	Background	0.198	294.499
N/A	Background	0.198	288.034
N/A	Background	0.198	282.37
	Avg Background	288.301
Replicate 3
Time Point (min)	Fraction	Box Area	Intensity	Intensity - Average Background		Uncleaved/Total
0	Uncleaved	0.238	466.191	121.194		0.965484
0.25	Uncleaved	0.238	449.552	104.555		1
0.5	Uncleaved	0.238	446.194	101.197		1
1	Uncleaved	0.238	450.09	105.093		1
3	Uncleaved	0.238	467.255	122.258		1
10	Uncleaved	0.238	463.396	118.399		0.97055
30	Uncleaved	0.238	468.602	123.605		0.938587
60	Uncleaved	0.238	466.598	121.601		0.920636
120	Uncleaved	0.238	457.9	112.903		0.920908
N/A	Background	0.238	342.357
N/A	Background	0.238	346.442
N/A	Background	0.238	346.191
	Avg Background	344.997
0	Cleaved	0.238	352.925	4.33267
0.25	Cleaved	0.238	346.97	0
0.5	Cleaved	0.238	345.069	0
1	Cleaved	0.238	343.921	0
3	Cleaved	0.238	347.675	0
10	Cleaved	0.238	352.185	3.59267
30	Cleaved	0.238	356.68	8.08767
60	Cleaved	0.238	359.075	10.4827
120	Cleaved	0.238	358.289	9.69667
N/A	Background	0.238	350.15
N/A	Background	0.238	348.854
N/A	Background	0.238	346.773
	Avg Background	348.592

## Sheet: DNA +RSC
80/80 DNA
With RSC
Replicate 1
Time Point (min)	Fraction	Box Area	Intensity	Intensity - Average Background		Uncleaved/Total
0	Uncleaved	0.231	545.148	218.056		0.998033
0.25	Uncleaved	0.231	513.156	186.064		0.974945
0.5	Uncleaved	0.231	529.754	202.662		0.943186
1	Uncleaved	0.231	526.242	199.15		0.893111
3	Uncleaved	0.231	528.183	201.091		0.770786
10	Uncleaved	0.231	461.515	134.423		0.531972
30	Uncleaved	0.231	416.954	89.8617		0.316797
60	Uncleaved	0.231	362.397	35.3047		0.148243
120	Uncleaved	0.231	343.488	16.3957		0.0690581
N/A	Background	0.231	328.589
N/A	Background	0.231	328.796
N/A	Background	0.231	323.892
	Avg Background	327.092
0	Cleaved	0.317	465.456	0.429667
0.25	Cleaved	0.317	469.808	4.78167
0.5	Cleaved	0.317	477.234	12.2077
1	Cleaved	0.317	488.861	23.8347
3	Cleaved	0.317	524.826	59.7997
10	Cleaved	0.317	583.291	118.265
30	Cleaved	0.317	658.822	193.796
60	Cleaved	0.317	667.876	202.85
120	Cleaved	0.317	686.049	221.023
N/A	Background	0.317	458.502
N/A	Background	0.317	455.693
N/A	Background	0.317	480.884
	Avg Background	465.026
Replicate 2
Time Point (min)	Fraction	Box Area	Intensity	Intensity - Average Background		Uncleaved/Total
0	Uncleaved	0.266	675.997	297.549		1
0.25	Uncleaved	0.266	671.713	293.265		1
0.5	Uncleaved	0.266	676.655	298.207		0.514929
1	Uncleaved	0.266	666.386	287.938		0.511712
3	Uncleaved	0.266	652.266	273.818		0.503327
10	Uncleaved	0.266	601.236	222.788		0.482241
30	Uncleaved	0.266	583.145	204.697		0.462812
60	Uncleaved	0.266	500.637	122.189		0.399962
120	Uncleaved	0.266	412.992	34.544		0.336951
N/A	Background	0.266	377.174
N/A	Background	0.266	380.185
N/A	Background	0.266	377.985
	Avg Background	378.448
0	Cleaved	0.432	637.42	5.07033
0.25	Cleaved	0.432	635.881	3.53133
0.5	Cleaved	0.432	643.644	11.2943
1	Cleaved	0.432	645.517	13.1673
3	Cleaved	0.432	676.858	44.5083
10	Cleaved	0.432	751.073	118.723
30	Cleaved	0.432	812.681	180.331
60	Cleaved	0.432	927.526	295.176
120	Cleaved	0.432	999.535	367.185
N/A	Background	0.432	650.646
N/A	Background	0.432	618.343
N/A	Background	0.432	628.06
	Avg Background	632.35
Replicate 3
Time Point (min)	Fraction	Box Area	Intensity	Intensity - Average Background		Uncleaved/Total
0	Uncleaved	0.311	677.215	222.277		0.995341
0.25	Uncleaved	0.311	653.28	198.342		0.989635
0.5	Uncleaved	0.311	674.527	219.589		0.99146
1	Uncleaved	0.311	663.104	208.166		0.982238
3	Uncleaved	0.311	678.45	223.512		0.927677
10	Uncleaved	0.311	655.288	200.35		0.795838
30	Uncleaved	0.311	616.596	161.658		0.533262
60	Uncleaved	0.311	544.13	89.192		0.266914
120	Uncleaved	0.311	473.652	18.714		0.0662653
N/A	Background	0.311	452.418
N/A	Background	0.311	456.406
N/A	Background	0.311	455.99
	Avg Background	454.938
0	Cleaved	0.486	714.038	1.04033
0.25	Cleaved	0.486	715.075	2.07733
0.5	Cleaved	0.486	714.889	1.89133
1	Cleaved	0.486	716.762	3.76433
3	Cleaved	0.486	730.423	17.4253
10	Cleaved	0.486	764.395	51.3973
30	Cleaved	0.486	854.489	141.491
60	Cleaved	0.486	957.966	244.968
120	Cleaved	0.486	976.694	263.696
N/A	Background	0.486	712.975
N/A	Background	0.486	714.702
N/A	Background	0.486	711.316
	Avg Background	712.998
