# Supplementary figures and images for: Nucleosome breathing and remodeling constrain CRISPR-Cas9 function
Source: eLife journal article supplement (doi:10.7554/elife.13450), 2016-04-28

Figure 1 Supplement 1

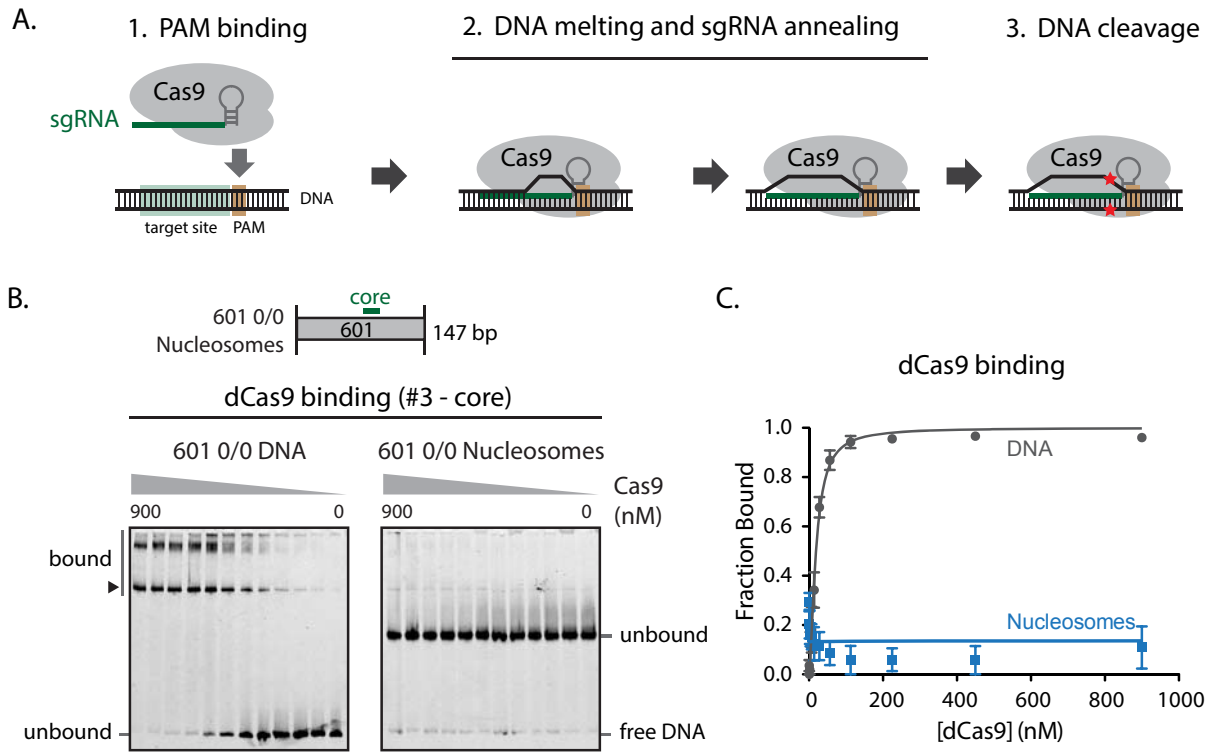

Supplement: supp [file elife_poa_e13450_Figure_1_Figure_supplement_1.pdf › elife_poa_e13450_Figure_1_Figure_supplement_1.pdf]

Figure 2 Supplement 1

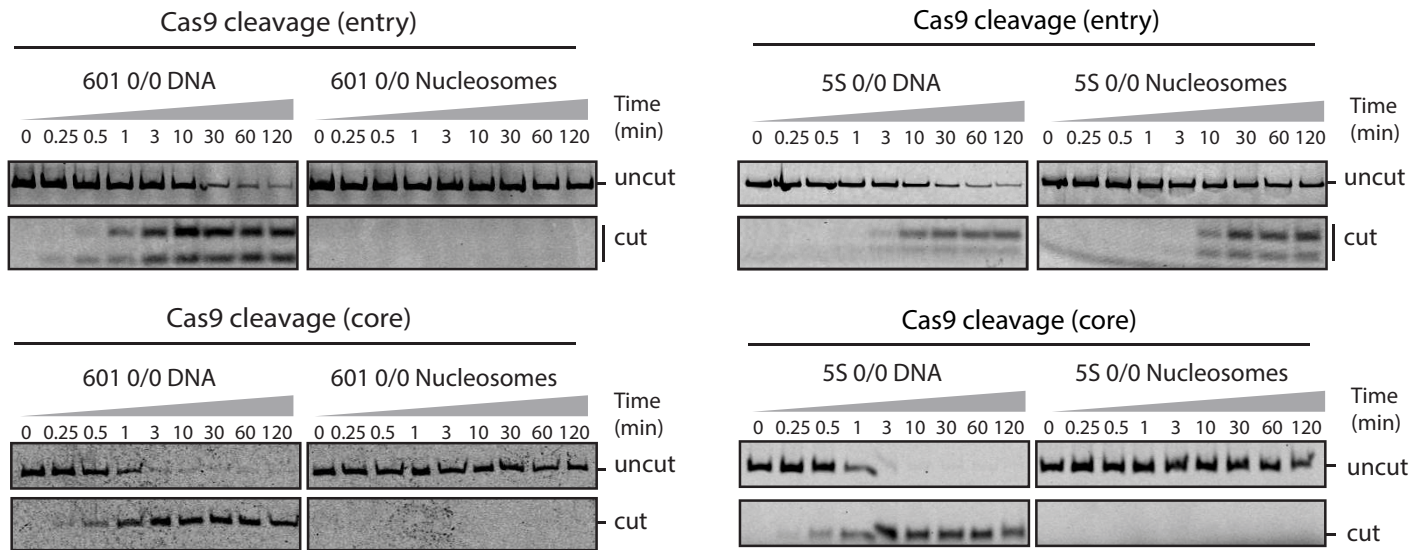

Supplement: supp [file elife_poa_e13450_Figure_2_Figure_supplement_1.pdf › elife_poa_e13450_Figure_2_Figure_supplement_1.pdf]

Figure 3 Supplement 1

A.

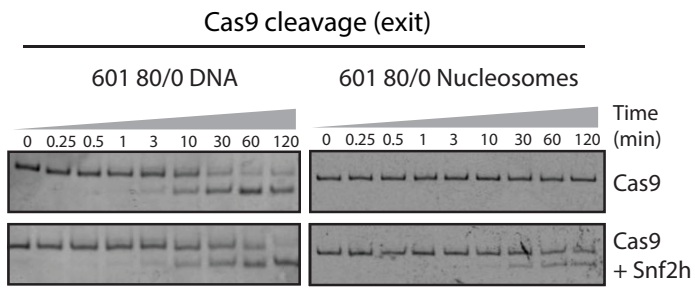

B.

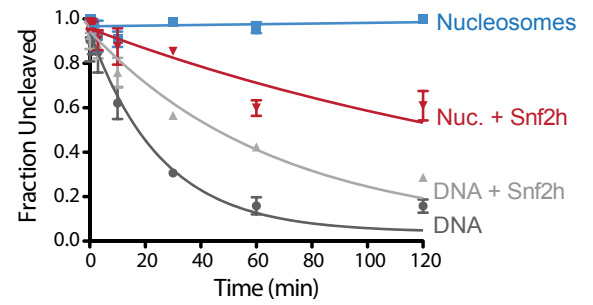

D.

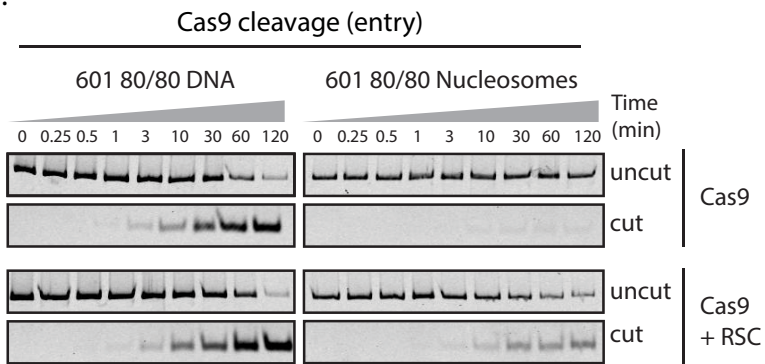

E.

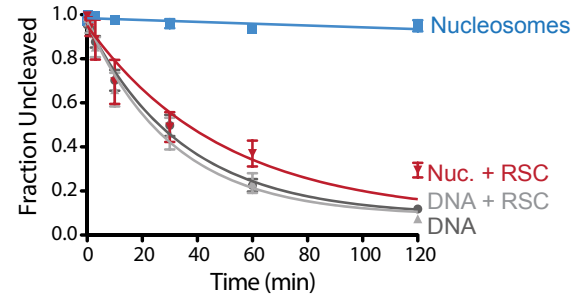

Supplement: supp [file elife_poa_e13450_Figure_3_Figure_supplement_1.pdf › elife_poa_e13450_Figure_3_Figure_supplement_1.pdf]

Figure 3 Supplement 2

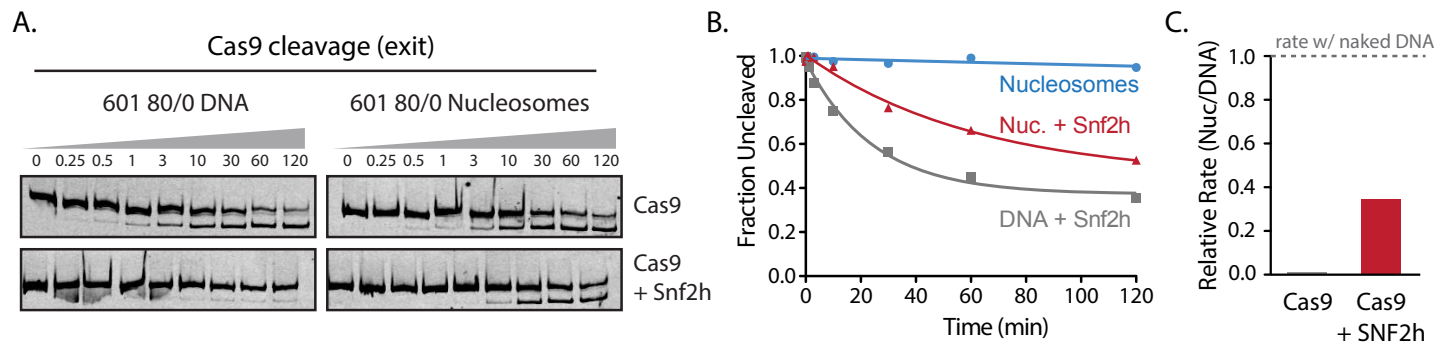

Supplement: supp [file elife_poa_e13450_Figure_3_Figure_supplement_2.pdf › elife_poa_e13450_Figure_3_Figure_supplement_2.pdf]

Figure 3 Supplement 3

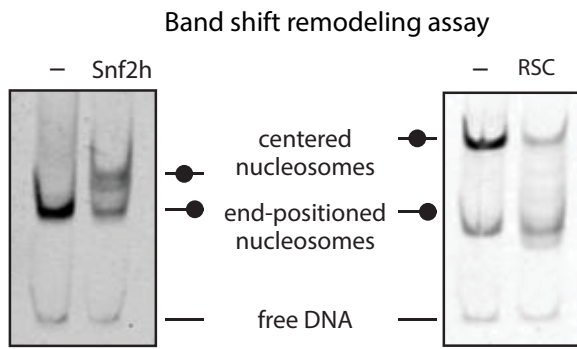

Supplement: supp [file elife_poa_e13450_Figure_3_Figure_supplement_3.pdf › elife_poa_e13450_Figure_3_Figure_supplement_3.pdf]
